## **AMACR amplification and overexpression in primary imatinib-naïve gastrointestinal stromal tumors: a driver of cell proliferation indicating adverse prognosis**

**Chien-Feng Li<sup>1,2,3,4</sup>, Li-Tzong Chen<sup>2,3,5,6</sup>, Jui Lan<sup>7</sup>, Fong-Fu Chou<sup>8</sup>, Ching-Yih Lin<sup>9,10</sup>, Yen-Yang Chen<sup>11</sup>, Tzu-Ju Chen<sup>1</sup>, Shau-Hsuan Li<sup>11</sup>, Shih-Chen Yu<sup>7</sup>, Fu-Ming Fang<sup>12</sup>, Hui-Chun Tai<sup>13</sup> and Hsuan-Ying Huang<sup>7</sup>**

<sup>1</sup> Department of Pathology, Chi-Mei Medical Center, Tainan, Taiwan

<sup>2</sup> National Institute of Cancer Research, National Health Research Institutes, Tainan, Taiwan

<sup>3</sup> Institute of Clinical Medicine, Kaohsiung Medical University, Kaohsiung, Taiwan

<sup>4</sup> Department of Biotechnology, Southern Taiwan University of Science and Technology, Tainan, Taiwan

<sup>5</sup> Department of Internal Medicine and Cancer Center, Kaohsiung Medical University Hospital, Kaohsiung Medical University, Kaohsiung, Taiwan

<sup>6</sup> Institutes of Molecular Medicine, National Cheng Kung University, Tainan, Taiwan

<sup>7</sup> Department of Pathology, Kaohsiung Chang Gung Memorial Hospital and Chang Gung University College of Medicine, Kaohsiung, Taiwan

<sup>8</sup> Department of Surgery, Kaohsiung Chang Gung Memorial Hospital and Chang Gung University College of Medicine, Kaohsiung, Taiwan

<sup>9</sup> Department of Tourism Management, Southern Taiwan University of Science and Technology, Tainan, Taiwan

<sup>10</sup> Department of Internal Medicine, Chi-Mei Medical Center, Tainan, Taiwan

<sup>11</sup> Division of Oncology, Department of Internal Medicine, Kaohsiung Chang Gung Memorial Hospital and Chang Gung University College of Medicine, Kaohsiung, Taiwan

<sup>12</sup> Department of Radiation Oncology, Kaohsiung Chang Gung Memorial Hospital and Chang Gung University College of Medicine, Kaohsiung, Taiwan

<sup>13</sup> Department of Pathology, Changhua Christian Hospital, Changhua, Taiwan

**Correspondence to:** Hsuan-Ying Huang, **email:** a120600310@yahoo.com

**Keywords:** GIST, 5p, AMACR, amplification, proliferation

**Received:** August 13, 2014

**Accepted:** October 18, 2014

**Published:** October 18, 2014

This is an open-access article distributed under the terms of the Creative Commons Attribution License, which permits unrestricted use, distribution, and reproduction in any medium, provided the original author and source are credited.

### **ABSTRACT**

**Non-random gains of chromosome 5p have been observed in clinically aggressive gastrointestinal stromal tumors, whereas the driving oncogenes on 5p remain to be characterized. We used an integrative genomic and functional approach to identify amplified oncogenes on 5p and to evaluate the relevance of AMACR amplification at 5p13.3 and its overexpression in gastrointestinal stromal tumors. Thirty-seven tumor samples, imatinib-sensitive GIST882 cell line, and imatinib-resistant GIST48 cell line were analyzed for DNA imbalances using array-based genomic profiling. Forty-one fresh tumor samples of various risk categories were enriched for pure tumor cells by laser capture microdissection and quantified for AMACR mRNA expression. AMACR-specific fluorescence in situ hybridization and immunohistochemistry were both informative in tissue microarray sections of 350 independent primary gastrointestinal stromal tumors, including 213 cases with confirmed *KIT* / *PDGFRA* genotypes. To assess the oncogenic functions of AMACR, GIST882 and GIST48 cell lines were stably silenced against their endogenous AMACR expression. In 59% of cases featuring 5p gains, two major amplicons encompassed discontinuous chromosomal regions that were differentially overrepresented in high-risk cases, including the one harboring the mRNA-upregulated AMACR gene. Gene amplification was detected in 19.7% of cases**

**(69/350) and strongly related to protein overexpression ( $p < 0.001$ ), although 52% of AMACR-overexpressing cases exhibited no amplification. Both gene amplification and protein overexpression were significantly associated with epithelioid histology, larger size, increased mitoses, higher risk levels, and unfavorable genotypes (all  $p \leq 0.03$ ). They were also independently predictive of decreased disease-free survival (overexpression,  $p < 0.001$ ; amplification,  $p = 0.020$ ) in the multivariate analysis. Concomitant with downregulated cyclin D1, cyclin E, and CDK4, AMACR knockdown suppressed cell proliferation and induced G<sub>1</sub>-phase arrest, but did not affect apoptosis in both GIST882 and GIST48 cells. In conclusion, AMACR amplification is a mechanism driving increased mRNA and protein expression and conferring aggressiveness through heightened cell proliferation in gastrointestinal stromal tumors.**

## INTRODUCTION

As the most common mesenchymal tumors of the digestive tract, gastrointestinal stromal tumors (GISTs) are believed to derive from interstitial Cajal cells or their precursors [1, 2]. Mutations of the *KIT* or *PDGFRA* genes, leading to constitutive activation of the encoded receptor tyrosine kinases (RTKs), are present but mutually exclusive in the vast majority of GISTs, driving tumor inception and dictating treatment response to imatinib [2, 3]. The *KIT/PDGFRA* genotypes have been reported to be variably associated with aggressiveness of resected imatinib-naïve GISTs, while their prognostic value was not uniformly validated in prior studies [4-10]. Through deleted tumor suppressor genes and amplified oncogenes, sequential accumulation of chromosomal imbalances further contribute to the aggressiveness of GISTs in tumor evolution [11-14]. Although the NIH risk scheme has proven prognostically useful, more accurate prognostication is becoming a critical issue in the post-imatinib era, for the purpose of counseling for outcomes and identifying targetable aberrant molecules other than RTKs [8, 15-19].

Conventional and array-based comparative genomic hybridization (aCGH) studies have indicated that chromosomal losses are more prevalent than gains in most GISTs, especially -14q and -22q known as the early cytogenetic events [12-14, 20, 21]. In contrast, the losses of other chromosomal regions or arms, such as -1p, -9p, and -9q, preferentially occur in aggressive GISTs with or without concomitant chromosomal gains, particularly +5p, +5q, and +8q [12-14]. Of these chromosomal aberrations occurring at later stages, we previously profiled the DNA copy number alterations on chromosome 9 and characterized the clinical relevance of homozygous *MATP* gene deletion at 9p21.3 in GISTs [22]. However, the individual prognostic implications of different chromosomal gains in GISTs have been inconsistent in the literature and the derived candidate oncogenes remain largely undefined [11-14]. To search for candidate oncogenes relevant to tumor progression, we performed global genomic profiling analysis of two cell lines and 37

GIST samples, including 22 previously published cases [22]. We gave special emphasis to chromosome 5, which displayed differentially gained regions on both arms in high-risk GISTs. Given recurrent gains spanning its DNA locus with significantly increased mRNA expression in higher-risk GISTs, we specifically selected alpha-methylacyl coenzyme A racemase (*AMACR*) at 5p13.3 to evaluate its biological and clinical relevance in cell lines and independent samples.

As a cofactor-independent peroxisomal and mitochondrial enzyme, AMACR acts as a gatekeeper for the  $\beta$ -oxidation of dietary branched-chain fatty acids and bile acid synthesis [23]. The oncogenic role of AMACR in driving tumor growth was first unraveled in prostatic intraepithelial neoplasia and adenocarcinomas by cDNA microarray analysis [24-26], which, albeit with variable prognostic implication, was subsequently reported in several other carcinoma types [27-30]. However, little is known about the mechanisms underpinning AMACR overexpression that causes metabolic deregulation in cancers. In this study, we characterize gene amplification as a mechanism that drives AMACR overexpression with negative prognostic consequences in GISTs. In two *AMACR*-expressing cell lines, RNA interference substantiated a cell cycle-arresting effect linked to the concomitantly downregulated cyclin D1, cyclin E, and CDK4, thus providing a mechanistic basis for the proliferation-enhancing function of AMACR in promoting GIST progression. Moreover, overexpressed AMACR might represent a potential therapeutic target in imatinib-resistant GISTs, for which we found that a non-substrate-based covalent inactivator of AMACR resulted in reduced viability of one such cell model (GIST48) with concomitant G1 arrest and cell apoptosis.

## RESULTS

### High-risk GISTs displayed differentially increased *AMACR* gene copies in genomic profiling and were associated with higher levels of *AMACR* mRNA

Chromosomal imbalances of varying degrees were detected in all samples subjected to aCGH profiling. Using Nexus software, we identified more recurrent regions of deletions than gains in GISTs across the whole genome.

In line with the previous literature [11, 12, 14], the most common chromosomal aberration (Figure-1A) was -14, as detected in 82.1% of the samples. Other common recurrent alterations with variable extent of involvement included -15, +7, -22q, and -1p in 60-80 % of samples, +5p, +5q, +8q, and +12p in 40-60%, and -9p, +16p, -10q, and -11p in 20-40%. Of these, the differential alterations significantly prevalent in high-risk GISTs and cell lines included -1p, -9p, +5p, +8q, +5q, +7, +12p, +16p, -10q, and -11p (Figure-1B, Table-S2). In 59% of samples, prominent DNA gains were found to involve 5p wherein discontinuous chromosomal regions differentially overrepresented in high-risk GISTs were mainly

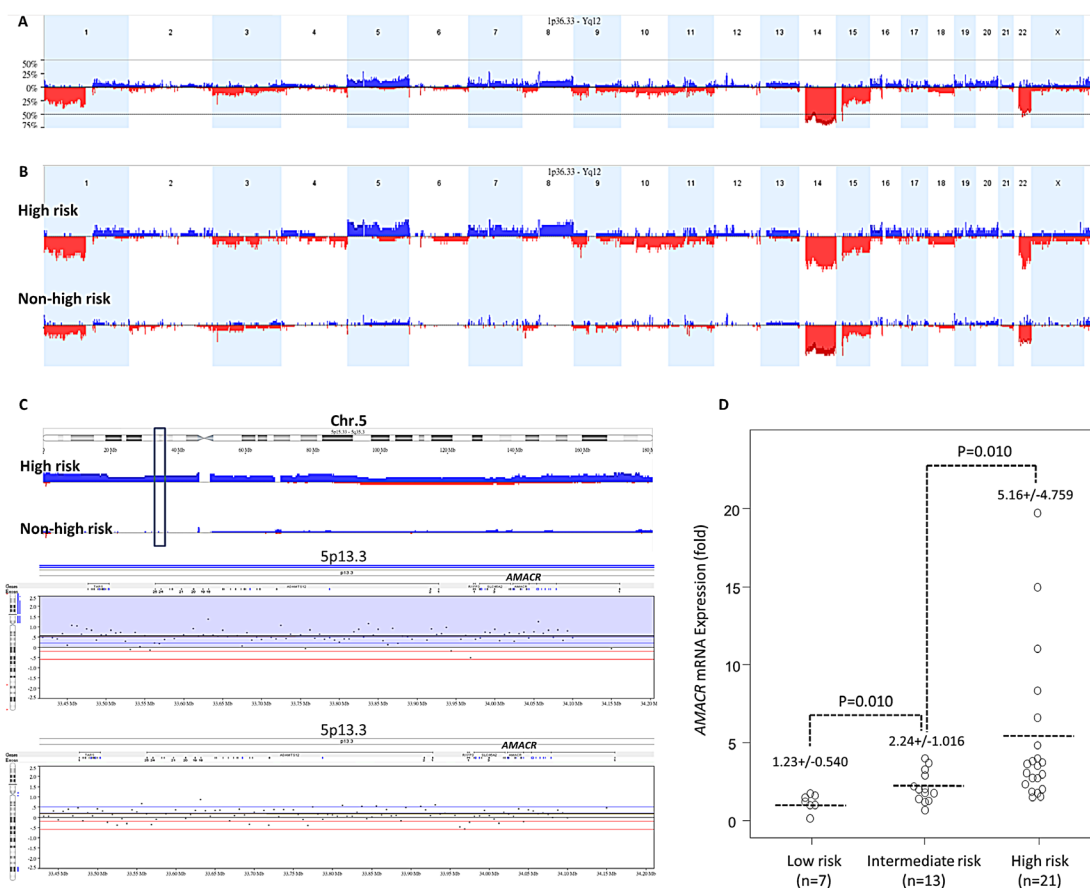

**Figure-1: (A) Profiling of genome-wide copy number imbalances in 39 samples.** By applying Nexus software, DNA copy number gains (blue) and losses (red) in GISTs are shown in the upward and downward directions, respectively, along the horizontal coordinate of individual chromosomes. The frequency plot of gains and losses is shown in the vertical axis. Generally concordant with the reported literature, the most frequent chromosomal aberration is -14, seen in more than 80% of samples we evaluated, followed by -15, +7, -22q, and -1p. **(B) Identification of significant differential chromosomal aberrations.** As compared to the 23 low/intermediate-risk samples, the following copy number imbalances, including -1p, -9p, +5p, +8q, +5q, +7, +12p, +16p, -10q, and -11p, are at least 25% more frequent in high-risk and cell line samples of GIST, with a p-value <0.05. **(C) Copy number alterations on 5p featuring gains of genomic DNA targeting the *AMACR* gene at 5p13.3. Upper panel:** The cytoband of chromosome 5 is shown on the top. Varying length of gained regions were detected in 59% of samples. The chromosomal regions differentially overrepresented in high-risk cases were mainly clustered in 5p15.33-p15.1 and 5p13.3-p12 (upper). Of the latter amplicon harboring 120 named genes, the locus of *AMACR* was at the 5p13.3 region (green vertical rectangle) with increased copies in 25% of samples. Lower panel: Representative samples with the amplified *AMACR* gene are illustrated in the zoom-in view. The unit in the vertical axis is the log<sub>2</sub> ratio of copy number alterations. **(D) Quantitative RT-PCR assay** shows that fold expression of *AMACR* mRNA in the pure tumor cells from fresh samples is the most abundant in high-risk GISTs classified by the NIH grading scheme, followed by intermediate-risk and then by low-risk cases.

**Table-1: Associations of AMACR expression and gene dosage with various clinicopathological parameters in 350 GIST patients.**

|                                           | AMACR Expression |            | p-value                      | AMACR Gene |            | p-value                      |
|-------------------------------------------|------------------|------------|------------------------------|------------|------------|------------------------------|
|                                           | Low              | High       |                              | No Amp.    | Amp.       |                              |
| <b>Sex</b>                                |                  |            | 0.620                        |            |            | 0.404                        |
| Male                                      | 110              | 63         |                              | 139        | 38         |                              |
| Female                                    | 108              | 69         |                              | 142        | 31         |                              |
| <b>Age (years)</b>                        | 59.2±13.17       | 60.9±12.05 | 0.216                        | 59.5±13.14 | 61.6±11.03 | 0.298                        |
| <b>Location</b>                           |                  |            | 0.722                        |            |            | 0.070                        |
| Gastric                                   | 133              | 78         |                              | 176        | 35         |                              |
| Non-gastric                               | 85               | 54         |                              | 105        | 34         |                              |
| <b>Histologic Type</b>                    |                  |            | <b>0.003<sup>a</sup></b>     |            |            | <b>0.001<sup>a</sup></b>     |
| Spindle                                   | 177              | 89         |                              | 224        | 42         |                              |
| Epithelioid & Mixed                       | 41               | 43         |                              | 57         | 27         |                              |
| <b>Tumor Size (cm)<sup>b</sup></b>        | 5.3±3.37         | 8.3±4.80   | <b>&lt;0.001<sup>a</sup></b> | 5.7±3.73   | 9.2±4.95   | <b>&lt;0.001<sup>a</sup></b> |
| <b>Mitotic Count (50HPFs)<sup>b</sup></b> | 5.1±13.65        | 16.0±32.84 | <b>&lt;0.001<sup>a</sup></b> | 6.89±18.57 | 18.8±35.78 | <b>&lt;0.001<sup>a</sup></b> |
| <b>NIH Risk</b>                           |                  |            | <b>&lt;0.001<sup>a</sup></b> |            |            | <b>&lt;0.001<sup>a</sup></b> |
| Low/Very low                              | 105              | 22         |                              | 121        | 6          |                              |
| Intermediate                              | 67               | 43         |                              | 92         | 18         |                              |
| High                                      | 46               | 67         |                              | 68         | 45         |                              |
| <b>Mutation Type</b>                      |                  |            | <b>0.022<sup>a</sup></b>     |            |            | <b>0.030<sup>a</sup></b>     |
| Favorable Type                            | 69               | 37         |                              | 86         | 20         |                              |
| Unfavorable Type                          | 53               | 54         |                              | 73         | 34         |                              |
| <b>AMACR expression</b>                   |                  |            |                              |            |            | <b>&lt;0.001<sup>a</sup></b> |
| Low expression                            |                  |            |                              | 212        | 6          |                              |
| High expression                           |                  |            |                              | 69         | 63         |                              |

<sup>a</sup>: Statistically significant, <sup>b</sup>: Wilcoxon rank-sum test

distributed in 5p15.33-p15.1 and 5p13.3-p12 (Figure-1C, upper). In the latter amplicon, 25% of high-risk GIST and cell line samples, but none of the low/intermediate-risk group, displayed increased copies of the *AMACR* gene in the 5p13.3 region (Figure-1C, lower, Table-S3). To elucidate whether *AMACR* was not only a passenger accompanied by +5p, we quantified *AMACR* mRNA in LCM-isolated tumor cells from fresh samples and found a significantly higher expression level in samples of higher risk categories (Figure-1D, p=0.01).

**AMACR gene amplification and protein overexpression were associated with each other, with unfavorable clinicopathological factors and RTK genotypes, and worse outcomes**

Next, we analyzed the clinical relevance of the *AMACR* gene copy number and its protein expression in a validation set of independent primary resected, imatinib-naïve GISTs. There were 350 GISTs with informative data for both assays that were available for clinical follow-up, comprising 127 very low/low-risk, 110 intermediate-risk, and 113 high-risk cases defined by NIH scheme. In

the FISH assay, *AMACR* amplification (69/350, 19.7%) was strongly related to *AMACR* immunohistochemical overexpression (132/350, 37.7%) (Figure-2A, Table-1, p<0.001). However, 52.3% (69/132) of *AMACR*-overexpressing tumors were not amplified at the *AMACR* locus, implying that alternative regulatory mechanism(s) drive *AMACR* overexpression. As seen in Table-1, those GISTs harboring amplified *AMACR* genes and overexpressed *AMACR* protein were strongly associated with the presence of epithelioid cells, large tumor size, higher mitotic rate (Figure-2B), and higher NIH risk levels (all p≤0.003). Moreover, both *AMACR* amplification (p=0.030) and *AMACR* overexpression (p=0.022) were related to unfavorable RTK genotypes (Figure-2C) and strongly predictive of worse DFS at the univariate level (Figure-3, Table-2, both p<0.0001). In multivariate analysis (Table-2), both *AMACR* amplification (p=0.020, hazard ratio: 2.005) and *AMACR* overexpression (p<0.001, hazard ratio: 3.728) remained independently prognostic of worse outcomes, together with higher NIH risk levels (p<0.001), presence of epithelioid histology (p=0.006), and unfavorable RTK genotypes (p=0.047).

In our cohort, we further examined the influence of the NCCN guideline (15) on both correlative and survival



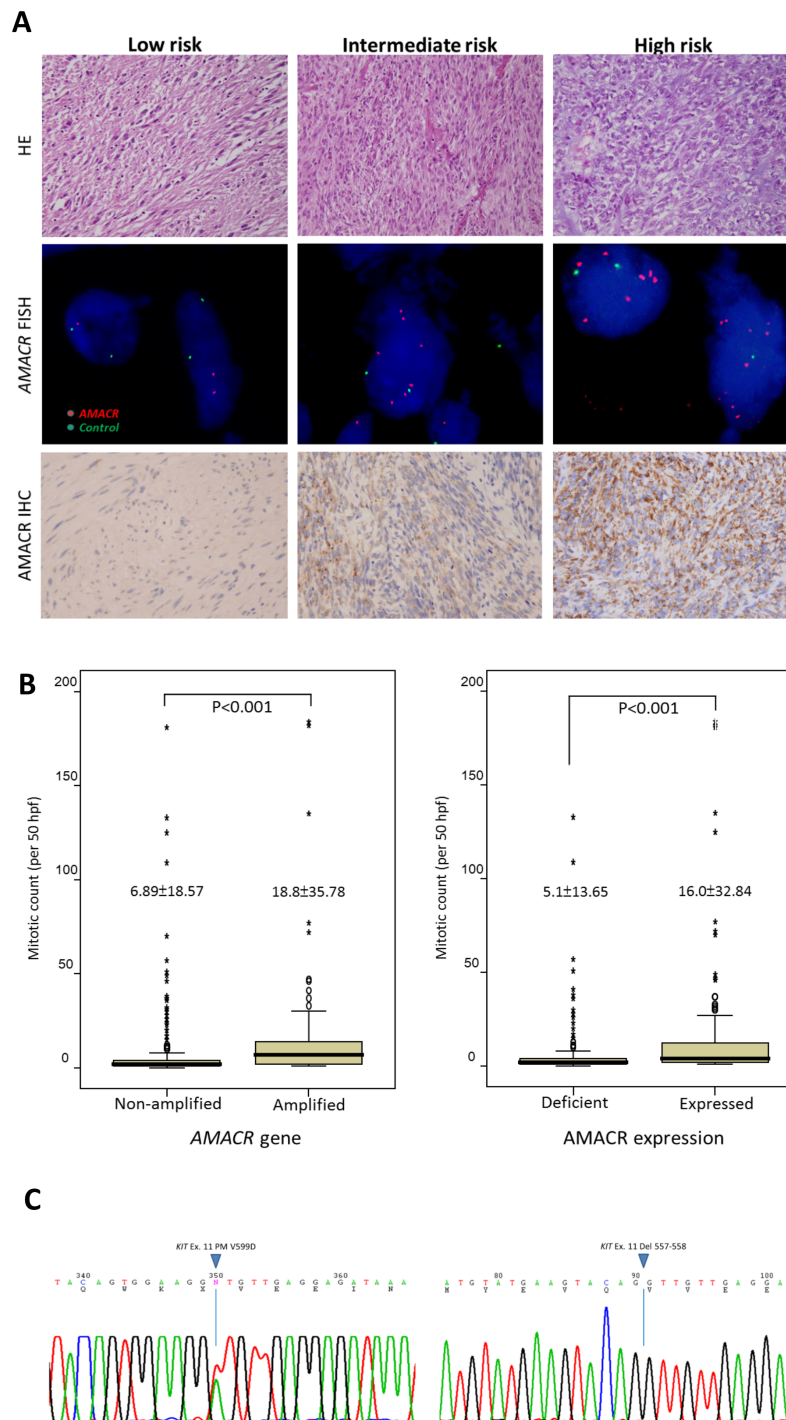

**Figure-2: (A)** Gradually increased cellularity and mitotic rates are observed in representative low-risk (left), intermediate-risk (middle), and high-risk (right) GISTs of the independent validation set (upper row). No amplification, low-level amplification, and high-level amplification are detected by FISH assay targeting the *AMACR* gene, with the ratio of the red signal to the green signal being 1, 4, and  $\geq 5$  in the corresponding cases, respectively (middle row). Granular cytoplasmic immunoexpression of AMACR is consistent with the subcellular distribution of mitochondria and peroxisomes and is classified as absent, increased, and overexpressed in the representative low-risk, intermediate-risk, and high-risk GISTs, respectively (lower row). **(B)** Comparison of mitotic activity shows significantly higher mitotic rates in GISTs with *AMACR* gene amplification (left) and protein overexpression (right) than in those without. **(C)** Mutation analysis of the *KIT* gene shows a favorable genotype (exon 11 point mutation) in one representative GIST featuring neither *AMACR* amplification nor *AMACR* overexpression (left) and an unfavorable genotype (exon 11 deletion at codons 557-558) in a representative *AMACR*-amplified GIST with protein overexpression (right).

**Table 2: Univariate and Multivariate Analyses for Disease-free survival**

| Parameter                                  | Univariate analysis |           |                               | Multivariate analysis |              |                              |
|--------------------------------------------|---------------------|-----------|-------------------------------|-----------------------|--------------|------------------------------|
|                                            | No. Case            | No. Event | p-value                       | HR                    | 95% CI       | p-value                      |
| <b>Sex</b>                                 |                     |           | 0.4667                        |                       |              |                              |
| Male                                       | 177                 | 43        |                               |                       |              |                              |
| Female                                     | 173                 | 44        |                               |                       |              |                              |
| <b>Age (years)</b>                         |                     |           | 0.0584                        |                       |              |                              |
| <70                                        | 259                 | 59        |                               |                       |              |                              |
| >=70                                       | 91                  | 28        |                               |                       |              |                              |
| <b>Location</b>                            |                     |           | <b>0.0023<sup>b</sup></b>     |                       |              | 0.376                        |
| Gastric                                    | 211                 | 40        |                               | 1                     | -            |                              |
| Non-gastric                                | 139                 | 47        |                               | 1.257                 | 0.758-2.083  |                              |
| <b>Histologic Type</b>                     |                     |           | <b>&lt;0.0001<sup>b</sup></b> |                       |              | <b>0.006<sup>b</sup></b>     |
| Spindle                                    | 266                 | 51        |                               | 1                     | -            |                              |
| Mixed/Epithelioid                          | 84                  | 36        |                               | 2.054                 | 1.234-3.419  |                              |
| <b>Tumor Size (cm)<sup>a</sup></b>         |                     |           | <b>&lt;0.0001<sup>b</sup></b> |                       |              |                              |
| =<5 cm                                     | 161                 | 16        |                               |                       |              |                              |
| >5; =<10 cm                                | 131                 | 38        |                               |                       |              |                              |
| >10 cm                                     | 58                  | 33        |                               |                       |              |                              |
| <b>Mitotic Count (50HPFs) <sup>a</sup></b> |                     |           | <b>&lt;0.0001<sup>b</sup></b> |                       |              |                              |
| 0-5                                        | 249                 | 33        |                               |                       |              |                              |
| 6-10                                       | 43                  | 14        |                               |                       |              |                              |
| >10                                        | 58                  | 40        |                               |                       |              |                              |
| <b>NIH Consensus</b>                       |                     |           | <b>&lt;0.0001<sup>b</sup></b> |                       |              | <b>&lt;0.001<sup>b</sup></b> |
| Very low/Low                               | 127                 | 6         |                               | 1                     | -            |                              |
| Intermediate                               | 110                 | 17        |                               | 4.115                 | 2.164-7.812  |                              |
| High                                       | 113                 | 64        |                               | 4.505                 | 1.745-11.628 |                              |
| <b>Mutation Type</b>                       |                     |           | <b>0.0005<sup>b</sup></b>     |                       |              |                              |
| Favorable type                             | 106                 | 22        |                               | 1                     | -            | <b>0.047<sup>b</sup></b>     |
| Unfavorable type                           | 107                 | 45        |                               | 1.702                 | 1.006-2.879  |                              |
| <b>AMACR gene</b>                          |                     |           | <b>&lt;0.0001<sup>b</sup></b> |                       |              | <b>0.020<sup>b</sup></b>     |
| Non-amplified                              | 281                 | 34        |                               | 1                     | -            |                              |
| Amplification                              | 69                  | 53        |                               | 2.005                 | 1.114-3.609  |                              |
| <b>AMACR expression</b>                    |                     |           | <b>&lt;0.0001<sup>b</sup></b> |                       |              | <b>&lt;0.001<sup>b</sup></b> |
| Low expression                             | 218                 | 21        |                               | 1                     | -            |                              |
| High expression                            | 132                 | 66        |                               | 3.728                 | 1.852-7.506  |                              |

<sup>a</sup>, Tumor size and mitotic activity were not introduced in multivariate analysis, since these two parameters were component factors of NIH risk scheme; <sup>b</sup>, Statistically significant. HR, hazard ratio.

analyses, demonstrating very similar results and statistical power to those defined by NIH risk scheme. AMACR protein overexpression and *AMACR* gene amplification ( $p < 0.001$  for both) were still highly associated with increasing risk levels (Table-S4). In the multivariate model (Table-S5), both *AMACR* amplification ( $p = 0.033$ , hazard ratio: 1.919) and *AMACR* overexpression ( $p < 0.001$ , hazard ratio: 3.627) remained independently prognostic of worse outcomes, together with higher NCCN risk levels ( $p < 0.001$ ) and presence of epithelioid histology ( $p = 0.008$ ). However, the unfavorable genotypes became only marginally significant ( $p = 0.055$ ).

### **AMACR expression promoted growth of GIST cells in vitro by enhancing cell cycle progression through upregulation of cyclin D1, CDK4, and cyclin E**

To gain insight into the biology, we next characterized the imatinib-sensitive GIST882 cells and imatinib-resistant GIST48 cells for their endogenous *AMACR* expression. The *AMACR* locus revealed a low-level copy number gain in GIST48 cells but remained unaltered in GIST882 cells in aCGH profiling. However,

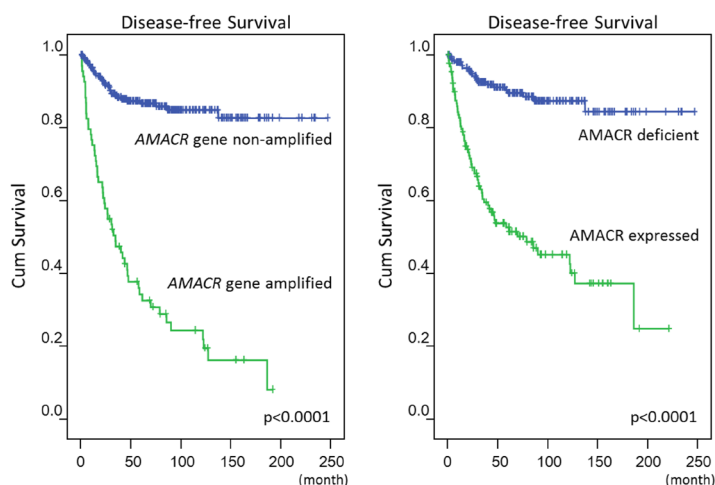

**Figure-3: Log-rank univariate analyses: *AMACR* amplification (left) and *AMACR* overexpression (right) are both highly predictive of worse disease-free survival.**

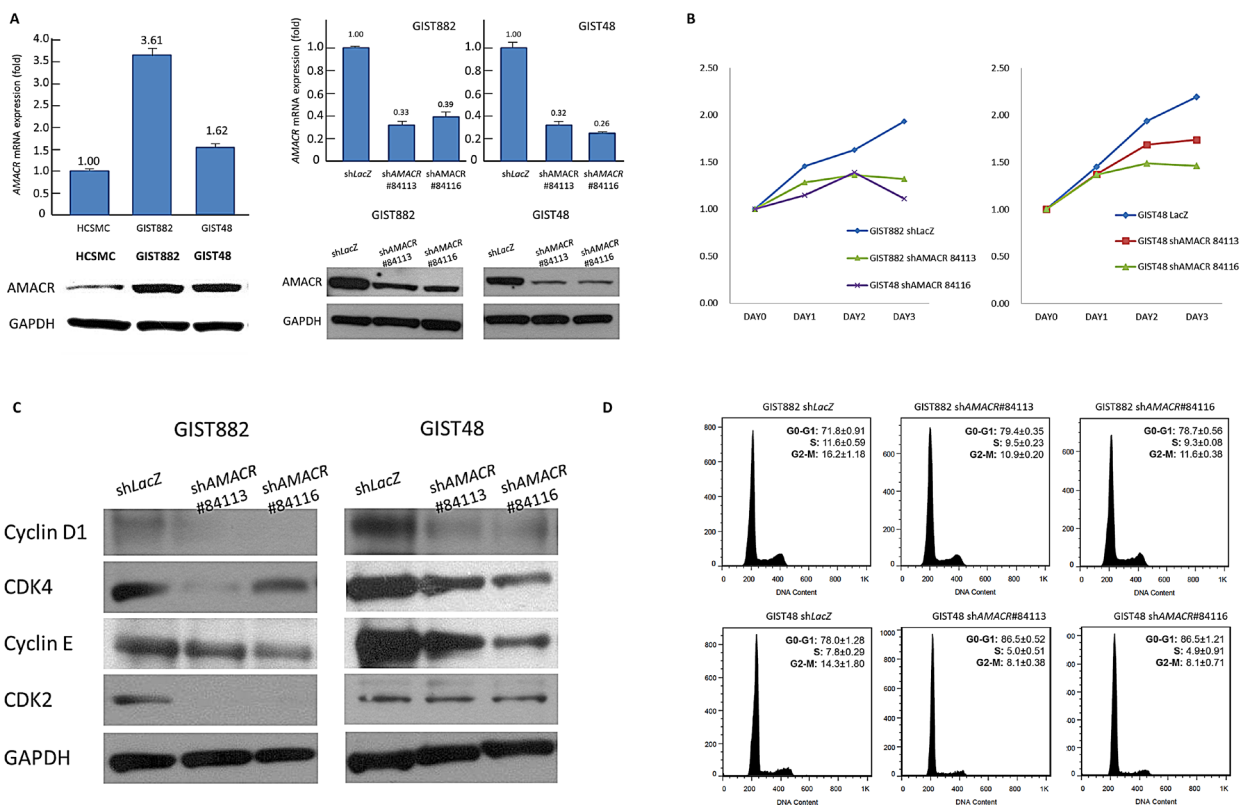

**Figure-4: *AMACR* overexpression confers tumor aggressiveness by promoting in vitro growth of GIST cell lines.** (A) Compared to primary HCSMC cells, endogenous *AMACR* mRNA (upper) and protein (lower) expression is higher in GIST882 and GIST48 cell lines (left panel). The two cell lines are stably silenced against endogenous *AMACR* expression by a lentiviral vector bearing one of the two *AMACR* shRNAs with different sequences for both GIST882 (middle panel) and GIST48 (right panel) cells. The efficiency of RNA silencing is confirmed by both quantitative RT-PCR (upper row) and western blotting (lower row) assays. The *shLacZ* plasmid, *POLR2A* transcript, and GAPDH protein are utilized as controls in RNA interference, quantitative RT-PCR, and western blotting assays, respectively. (B) Using an ELISA-based, colorimetric assay to assess the rate of BrdUrd uptake, cell proliferation is significantly reduced in stable *AMACR*-knockdown GIST882 (left) and GIST48 (right) cell lines, compared to the corresponding *shLacZ* controls. (C) Western blotting assay validates that Cyclin D1, CDK4, and cyclin E are consistently downregulated in protein abundance in both *AMACR*-knockdown GIST882 and GIST48 cell lines. (D) Representative flow cytometric experiments show the induction of G1 cell cycle arrests by *shAMACR* in GIST cells. Two stable clones each of *AMACR*-knockdown GIST882 (upper) and GIST48 (lower) cells display a cell cycle arrest primarily occurring in the G1 phase.

endogenous expression levels of AMACR mRNA and protein were significantly higher in both GIST cell lines using HCSMC primary cells as the baseline reference (Figure-4A, left). This observation was in keeping with the finding of human samples showing *AMACR* amplification in about a half of *AMACR*-overexpressing cases, and similarly implies alternative amplification-independent mechanism(s). We thus employed RNA interference to decipher the functional effects of *AMACR* overexpression, and remarkable silencing of *AMACR* expression was achieved in selected stable clones of GIST882 (Figure-4A, middle) and GIST48 cells (Figure-4A, right).

Compared with their *shLacZ* controls, the BrdUrd incorporation rates in both stable *AMACR*-silenced GIST882 and GIST48 cells were significantly attenuated (Figure-4B). This finding indicated the growth-promoting role of *AMACR* and prompted us to further explore its mediators and effect on cell cycle regulation. In western blotting assays, the expression levels of cyclin D1, cyclin E, and CDK4 proteins were concomitantly downregulated in both *AMACR*-knockdown GIST cell lines (Figure-4C), findings concordant with the result of cell cycle arrest in the G<sub>1</sub> phase determined by flow cytometry (Figure-4D). The *AMACR*-amplified GIST48 cells treated with

*shAMACR* or *shLacZ* control were further quantitated for *CCND1*, *CCNE1*, and *CDK4* mRNAs, and all significantly decreased in expression levels, indicating an *AMACR*-modulated transcriptional activation of these cell cycle-promoting mediators (Figure-S1). To clarify whether this growth-promoting effect might be linked to the pro-survival function, we performed flow cytometric analysis with annexin V/propidium iodide staining, which showed no apparent effect of *AMACR* expression on evasion of apoptosis (Figure-5)

### Imatinib-resistant GIST48 cells were sensitive to ebiselen oxide (EO) *in vitro*

EO is a non-substrate-based covalent inactivator of *AMACR* and has selective toxicity to *AMACR*-expressing prostatic cancer cells *in vitro* [31]. To test whether *AMACR* is potential alternative therapeutic target in imatinib-resistant GISTs, we characterized the inhibiting effect of EO on the imatinib-resistant, *AMACR*-amplified GIST48 cell line and found significantly diminished cell viability, with the IC<sub>50</sub> approximating 10 μM (Figure-S2A). Moreover, flow cytometric analysis revealed that

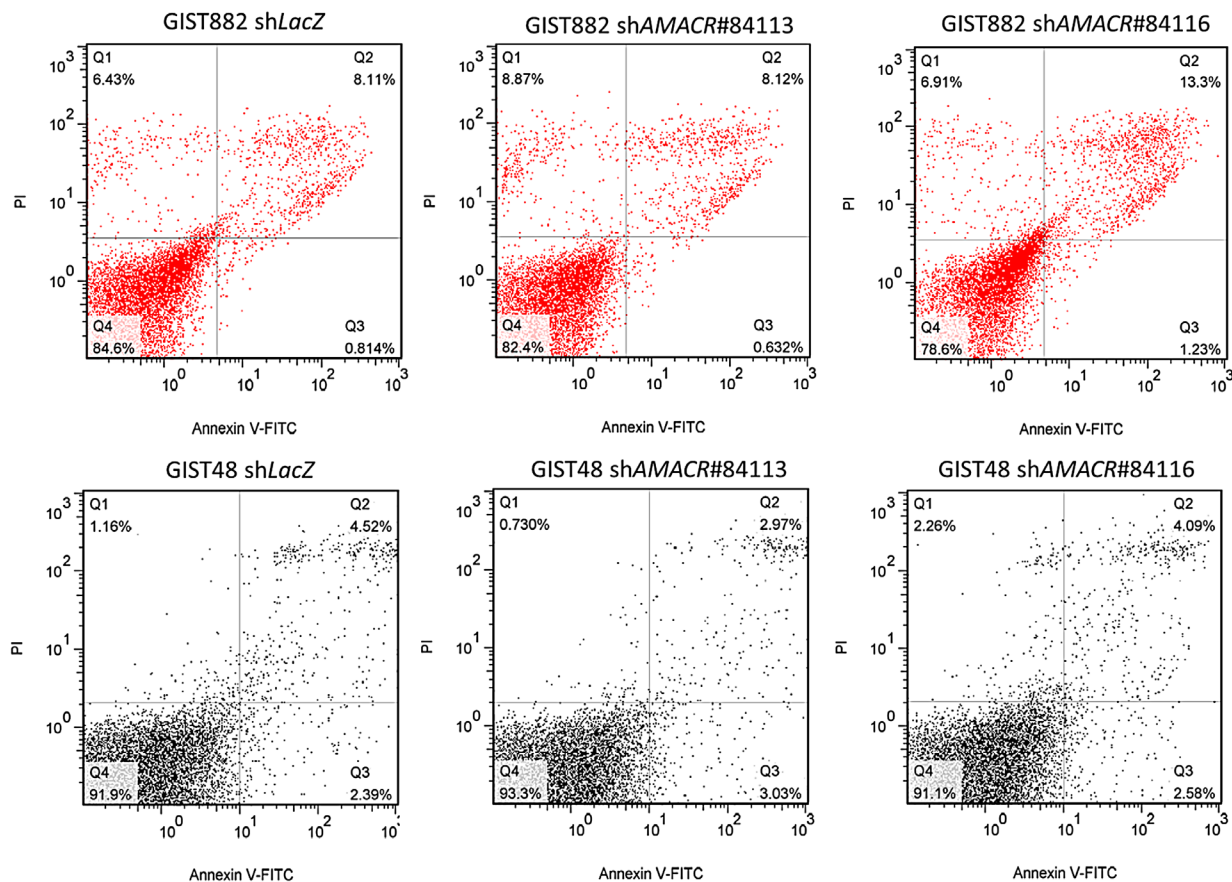

**Figure-5: *AMACR*-knockdown does not induce cell apoptosis in *AMACR*-expressing GIST cell lines.** In both GIST882 (upper) and GIST48 (lower) cell lines, the cell percentages in the early and late stages of apoptosis analyzed by annexin V/propidium iodide staining are not significantly different between *shLacZ* controls and *shAMACR*-treated cells in three independent assays.



EO at the dose between 20~40  $\mu$ M induced significant G1 arrest (Figure-S2B) in cell kinetics and cell apoptosis (Figure-S2C) by annexin V/propidium iodine staining.

## DISCUSSION

In a variety of human neoplasms, including tumors of connective tissue origin, there are several complex amplicons on 5p with multiple discontinuous gained regions encompassing potential driver genes [32-35]. Based on the conventional comparative genomic hybridization studies, 5p gain represents non-random chromosomal alterations in GISTs that preferentially occur in the later stages of tumor evolution and have variable prognostic impacts [12, 13]. In our oligonucleotide-based aCGH profiling, the ultra-high resolution and sufficient sample number enabled refined mapping of genome-wide CNAs that were differentially involved in high-risk samples. Of the aberrant DNA gains, +5p (59.0%), following +7p (71.2%), ranked second in frequency of involvement in our series, and its regions of differential prevalence in high-risk samples were mainly distributed in two separate amplicons spanning 5p15.33-p15.1 and 5p13.3-p12, respectively.

To meet the definition of a genuine tumor-associated amplified oncogene, a candidate is required to consistently express the encoded mRNA and protein that in turn confer growth advantages on cancer cells in which it is amplified [36]. Among the candidates on 5p, we have characterized *AMACR* at 5p13.3 as a potential amplification-driven oncogene by showing that it has upregulated mRNA with a higher expression level in fresh GIST samples classified as high-risk. In our large independent validation cohort, increased *AMACR* gene copies and protein overexpression were demonstrated in an aggressive subset of human GISTs. Our in vitro assays further reinforced the oncogenic function of *AMACR*, which promotes an aggressive phenotype and disease progression through heightened cell proliferation.

*AMACR* is indispensable in the catabolism of phytol-derived, branched-chain fatty acids and was first identified to be aberrantly overexpressed in prostatic carcinomas [23-26]. To understand the growth advantage of the resultant metabolic deregulation, we should elucidate the molecular basis underlying *AMACR* overexpression, since most malignancies increase the need for fatty acids as an energy source [23, 30]. Using FISH, we have validated *AMACR* amplification in approximately 20% of GISTs, and *AMACR* amplification was notably reflected at the protein level and strongly correlated with immunohistochemical overexpression. However, alternative regulatory mechanism(s) other than increased gene copies are very likely to operate in a subset of GISTs, since 52% of *AMACR*-overexpressing cases in our samples showed no gene amplification by FISH. Moreover, the expression level of *AMACR* in common carcinomas is known to be

mostly regulated by various transcriptional factors, such as C/EBP family members, Sp1, and ZNF202 [23, 37, 38]. Recently, the downregulation of miR-26a was first found to link to the increased *AMACR* expression level in prostatic adenocarcinomas, and *AMACR* was further validated by functional assays to be a novel target of this tumor suppressive microRNA [39]. In this context, it may be of interest to examine the expression and significance of the aforementioned transcriptional factors and miR-26a in future study on GIST samples and cell lines.

The biological function of amplification-driven *AMACR* overexpression remains undefined in mesenchymal neoplasms. Recently, several lines of evidence have linked the racemase activity of *AMACR* to alterations in cancer cell behavior [26]. RNA interference showed that high *AMACR* protein concentration promoted cell proliferation of prostate carcinomas through its enhanced enzymatic activity in an androgen-independent manner [26]. In GISTs, both *AMACR* amplification and *AMACR* overexpression were associated with larger tumor size, higher mitotic count, and higher risk levels defined by the NIH grading scheme. These factors are established adverse clinicopathological prognosticators in GISTs, not only reported in the literature [1, 17-19] but also reaffirmed in this series. Intriguingly, we also found that increased *AMACR* gene copies and protein level were significantly related to the presence of epithelioid cells, another independent adverse factor we identified. Despite being reported as a poor univariate or even multivariate prognosticator, the real impact of this cytomorphological phenotype was variable in the literature [40-42], probably because of the inconsistent criteria to define "epithelioid". Notably, a subset of predominantly epithelioid GISTs with *PDGFRA* mutations is characterized by prominent myxoid stroma, gastric location, and indolent behavior [43], which should be distinct from those aggressive GISTs exhibiting varying proportions of epithelioid cells but lacking *PDGFRA* mutations and apparent preference for gastric location. Interestingly, both *AMACR* amplification and *AMACR* overexpression were also significantly related to unfavorable RTK genotypes, another independent predictor of worse DFS in our study and some of the previous series [4, 8, 9]. However, the molecular underpinning of this association is not clear, meriting further in vitro study of the biological effect of various RTK mutants on the regulation of *AMACR* expression in GIST cell lines that are not *AMACR*-amplified.

Of clinical relevance was the finding that both *AMACR* amplification and *AMACR* overexpression were independent negative prognosticators in primary resected, imatinib-naïve GISTs. These implications are mostly ascribed to the pro-proliferative attributes of *AMACR* for the maintenance of malignant phenotypes, rather than its effect on the modulation of cell apoptosis. In both *AMACR*-expressing GIST cell lines, *shAMACR* specifically impaired BrdUrd uptake, irrespective of

their gene status. Given that sustained cell growth is a fundamental hallmark of cancer [44], it was interesting to find that stable silencing of AMACR expression resulted in concomitantly downregulated protein expression of cyclin D1, CDK4, and cyclin E. In virtue of their significantly decreased mRNA expression levels in the AMACR-silenced GIST cells, this finding was likely operated at the transcriptional level and might partly provide a mechanistic basis for the induced G<sub>1</sub>-phase arrest seen in both AMACR-silenced GIST cell lines, hence confirming the oncogenic role of AMACR in driving uncontrolled cell proliferation.

In AMACR-expressing prostatic cancer cell lines, Festuccia et al. reported that trifluoroibuprofen, an AMACR inhibitor structurally analogous to ibuprofen, enabled the suppression of AMACR expression with concomitant cyclin D1 downregulation [45]. In this regard, their findings were similar to the effect of *shAMACR* on GIST cell lines. Although we found G<sub>1</sub>-phase arrest without apoptosis in AMACR-silenced GIST cells, trifluoroibuprofen-treated prostatic cancer cells exhibited G<sub>2</sub>/M-phase arrest and induction of apoptosis with reduced expression of pro-apoptotic survivin [45]. Compared with RNA interference, there are usually more variegated phenotype-modulating effects of chemical inhibitors on cancer cells, which may account for the variability in the drug-induced cell cycle-arresting phenomenon and are not ideal to be used for specifically elucidating the regulatory function of a single molecule in cancer biology. Along this line, we speculated that the AMACR-induced cell cycle progression might be operated by more diverse mechanisms, perhaps indirect and cell type-dependent, given the previously reported G<sub>2</sub>/M cell cycle arrest in AMACR-silenced LAPC-4 prostatic cancer cells [26].

In most GISTs treated with imatinib, the median duration of partial remission or disease stabilization lasts for approximately 1.5 to 2 years, because of the development of secondary kinase domain mutations in *KIT* and/or *PDGFRA* genes [46-48]. Moreover, in these imatinib-resistant GISTs, long-term remission remains difficult to achieve using other tyrosine kinase inhibitors [49]. Therefore, a broader understanding of the mechanisms underlying deregulated cancer metabolism may provide novel therapeutic strategies for these refractory GISTs by targeting potential tumor-promoting oncometabolites or associated metabolic enzymes [50]. In this context, AMACR may represent a promising targetable metabolic driver, since deficiency of AMACR, either in clinical or experimental settings, does not cause detrimental morbidity and mortality in humans and animal models [51, 52]. Moreover, a novel generation of nonsubstrate-based, non-competitive AMACR inhibitors have been recently identified [31]. Of these candidate compounds, EO has been shown to enable covalent inactivation of AMACR with potent cytotoxic selectivity for AMACR-expression prostatic cancer cell lines [31]. In

vitro, imatinib-resistant, *AMACR*-amplified GIST48 cells were dose-dependently susceptible to EO with declined cell viability, induction of cellular apoptosis, and cell cycle arrest at the G<sub>1</sub> phase. The combination of these effects may account for the potential anti-tumor activity of EO in imatinib-resistant GISTs, although there is still room for improving the drug potency of EO, given its modest IC<sub>50</sub> values at the scale of μM.

In short, AMACR has been substantiated as an amplification-driven oncogene in GISTs, given its risk level-associated mRNA upregulation and the in vitro evidence of a proliferation-promoting function in AMACR-expressing cell lines. Both *AMACR* gene amplification and protein overexpression are associated with adverse clinicopathological factors and independently predictive of inferior DFS in primary localized, imatinib-naïve GISTs. However, AMACR protein overexpression is approximately twice as prevalent as its gene amplification in GISTs, implying the operation of alternative regulatory mechanism(s) other than increased gene copies. Elucidating the molecular underpinning of AMACR overexpression in GISTs may open an alternative avenue of targeted therapy for those imatinib-resistant GISTs of high-risk aggressiveness.

## MATERIALS AND METHODS

### Cell culture

GIST882 and GIST48 cell lines, kind gifts from Professor Jonathan Fletcher, were cultured following the published methods [53-55]. Briefly, GIST48 and GIST882 cells were maintained in IMDM (Invitrogen) supplemented with 15% fetal bovine serum (FBS), 100 U/ml penicillin/streptomycin, and 4 mM L-glutamine (Invitrogen) at 37°C in 5% CO<sub>2</sub>. GIST882 was established from an untreated GIST with a imatinib-sensitive K642E mutation in *KIT* exon13. GIST48 was from a progressing GIST on imatinib therapy with a homozygous V560D mutation in *KIT* exon11 and a heterozygous D820A mutation in *KIT* exon17. Primary human colonic smooth muscle cells (HCSMC) were purchased from ScienCell and maintained at 37°C in smooth muscle cell medium (ScienCell) containing 500 ml of basal medium, 10 ml of FBS, 5 ml of smooth muscle cell growth supplement, and 5 ml of penicillin/streptomycin solution until the culture was approximately 90% confluent.

### Tumor materials

The institutional review boards of Chi-Mei (IRB098-06-003) and Chang Gung (102-2314B) hospitals approved this study. Together with GIST882 and GIST48 cell lines, aCGH profiling was performed to analyze genome-wide

somatic copy number alterations (CNAs) in 37 fresh GIST samples, including 10 low-risk, 13 intermediate-risk, and 14 high-risk cases classified by the NIH grading scheme [1]. Of these, 22 had been previously reported for CNAs on chromosome 9 [22].

To validate aCGH results, we retrieved formalin-fixed blocks of 370 primary resected GISTs from another cohort that were untreated by imatinib before disease relapse and independent of fresh samples for genomic profiling and *AMACR* mRNA quantification. The representative tissue cores of these cases were assembled into tissue microarrays (TMA), which were recut for fluorescent in situ hybridization (FISH) targeting the *AMACR* gene and AMACR immunostaining. Both assays were informative in 350 cases, of which we successfully determined RTK genotypes for 213, using previously described methods [8, 22]. Clinicopathological characteristics of the cohorts for aCGH analysis and for validation of *AMACR* gene status and immunoexpression are summarized in the supplementary Table-S1 and Table-1, respectively.

### Mutation analysis

The methods of DNA extraction, PCR amplification, direct sequencing of *KIT* exon 11, and denatured high performance liquid chromatography screening for exons 9, 13, and 17 of the *KIT* gene and exons 12 and 18 of the *PDGFRA* gene with confirmatory sequencing have been previously described [8, 22].

### Analysis of aCGH profiling

Thirty-three samples, including GIST882 and GIST48 cell lines, were profiled using Human CGH 385K Whole-Genome Tiling Array v1.0 (NimbleGen). Six recently acquired samples, including one intermediate-risk and five low-risk cases, were subjected to Human 3x720K Whole Genome CGH (NimbleGen). The methods of DNA preparation, hybridization, and aCGH data analysis used were essentially as previously reported [22, 35]. Briefly, we extracted 1 µg of genomic DNA each from cell lines and fresh tumor samples for hybridization against oligonucleotide-based microarrays. The raw data were  $\log_2$ -transformed, exported, and integrated using Nexus software (BioDiscovery) to profile the global somatic CNAs and depict the zoom-in view of imbalanced genes on 5p. To finely delineate the breakpoints in array probes, gains and losses in significant regions of CNAs were defined as  $\log_2$  ratios of  $\geq +0.20$  or  $\leq -0.20$ , respectively. To search for causal genes linked to CNA-driven deregulation in disease progression, chromosomal regions were considered to be differentially altered when their frequencies were at least 25% higher in the joint group of high-risk and cell line samples than in the remainder

( $p < 0.05$ , Student-t test).

### FISH

The *AMACR* gene copy number in GIST tissue samples was assessed on 4-µm TMA sections by locus-specific FISH. A laboratory-developed bacterial artificial chromosome probe (CTD-2340N2, Invitrogen), spanning *AMACR* at 5p13.3, was labeled with spectrum orange. According to our prior genomic profiling data, there were no CNAs at 19p12 where a region close to ZNF725 (CTB-2819, Invitrogen) was selected as the reference probe and labeled with spectrum green. The average numbers of red and green signals were determined by examining approximately 200 tumor cells in triplicate tissue cores for each specimen. Gene amplification was defined as a ratio of the gene probe signal to the control probe signal exceeding two.

### Immunohistochemistry

TMA sections were heated by microwave to retrieve tissue antigen, incubated with the primary antibody against AMACR (1:350; Biocare Medical), and detected using a ChemMate EnVision kit (Dako). One pathologist (JL) independently assessed immunohistochemical results to record a mean AMACR labeling index of cytoplasmic expression for each case. AMACR overexpression was defined as cases featuring 50% or more tumor cells with moderate or strong cytoplasmic staining using a previously reported scoring method [29].

### RNA interference

To establish stably silenced clones of *AMACR*-amplified GIST882 and GIST48 cell lines with the short-hairpin RNAs against AMACR expression (*shAMACR*), the lentiviral vectors were obtained from Taiwan National RNAi Core Facility, including pLKO.1-*shLacZ* (TRCN0000072223: 5'-TGTCGCATTAT CCGAACCAT-3') and pLKO.1-*shAMACR* (TRCN0000084113: 5'-CCACAAATTGTATGGTGAT -3'; TRCN0000084116: 5'-CGAAGAGATTTATCAGCTT -3'). Viruses were produced by transfecting HEK293 cells with the above three vectors using Lipofectamine 2000. For viral infection,  $3 \times 10^6$  GIST882 or GIST48 cells were incubated with 8 ml lentivirus in the presence of polybrene, followed by puromycin selection for stable clones of lentivirus-transduced cells.



## Quantification of *AMACR* transcript

Real-time RT-PCR was performed using an ABI StepOnePlus™ System to measure *AMACR* mRNA abundance in laser capture microdissection (LCM)-isolated tumor cells from 41 fresh GIST tissue samples, including 21 high-risk, 13 intermediate-risk, and 7 low-risk cases. RNeasy Mini kit (Qiagen, Valencia, CA) was used to extract total RNAs from primary human colonic smooth muscle cells (HCSMC) and stable clones of GIST cell lines with lentiviral vectors bearing either *shAMACR* or *shLacZ*. The methods of total RNA extraction from LCM-isolated GIST tumor cells was as previously described [8]. RNAs were further reverse-transcribed using SuperScript™ III First-Strand Synthesis System (Invitrogen, Carlsbad, CA) according to the manufacturers' instructions. Real-time PCR assay to quantify the expression level of *AMACR* transcript was performed using pre-designed TaqMan assay reagents (*AMACR* Hs01091294\_m1, *CCND1* Hs00765553\_m1, *CCNE1* Hs01026536\_m1, *CDK4* Hs01565683\_g1, and *POLR2A* [a.k.a, RNA polymerase polypeptide A] Hs01108291\_m1 from Applied Biosystems, Foster City, CA). The obtained data were normalized by the expression of *POLR2A* housekeeping transcript. After normalization to *POLR2A*, the relative expression fold of *AMACR* transcript was then given by  $2^{-\Delta\Delta C_p}$ , where  $\Delta\Delta C_T = \Delta C_T(\text{GIST cells}) - \Delta C_T(\text{calibrator})$ ,  $\Delta C_T$  represented the  $C_T$  of *AMACR* subtracted from the  $C_T$  of *POLR2A*, and the calibrator was HCSMC for cell lines and non-neoplastic gastric tissue for microdissected tissue samples. Only samples with  $C_T$  value <32 for *POLR2A* were considered to have acceptable RNA quality and included in the analyses.

## Western blots

The western blotting assay was performed to evaluate the endogenous *AMACR* expression and the efficiency of *AMACR* knockdown in GIST882 and GIST48 cell lines. Cell lysates containing 25 µg protein were separated by 4-12% gradient NuPAGE gel (Invitrogen), transferred onto PVDF membranes (Amersham), and probed with antibodies against GADPH (1:3000, Chemicon), and proteins of interest. The latter included anti-*AMACR* (1:250, Invitrogen), anti-cyclin D1 (1:10000, Epitomics), anti-cyclin E (1:200, Abcam), anti-CDK2 (1:2000, Epitomics), and anti-CDK4 (1:200, Abcam). After incubation with the secondary antibody, proteins were visualized by the chemiluminescence system (Amersham).

## Pharmacological assays

Ebselen oxide (EO) was obtained from Sigma. We seeded GIST48 cells in 96-well plates at a density of  $5 \times 10^3$  cells/well the day before treatment with vehicle control (0.9% saline) or EO at indicated concentrations (10 ~160 µM) for 72 h.

## Bromodeoxyuridine (BrdU) assay to assess DNA synthesis

DNA synthesis was assessed using an enzyme-linked immunosorbent assay-based and colorimetric BrdU assay (Roche Diagnostics). *AMACR*-knockdown or *shLacZ* control GIST882 and GIST48 cells were plated into a 96-well plate at density of 3000 cells per well, and DNA synthesis was evaluated at 24, 48, and 72 h. After incubation with BrdU for 3 hours at 37°C under 5% CO<sub>2</sub>, the labeling medium was removed, followed by fixation and final incubation with anti-BrdU-POD solution. The absorbance of the samples was measured using an ELISA reader (Promega) at 450 nm, with the absorbance at 690 nm as reference.

## Flow cytometric analysis of cell cycle kinetics

Stable pools of *AMACR*-knockdown versus corresponding *shLacZ* control GIST cell lines and GIST48 cells treated with EO or vehicle control were pelleted and fixed overnight in 75% cold ethanol at -20°C. Cells were washed twice in cold PBS containing 10 mg/ml of DNase-free RNase. Afterwards, these cells were labeled with propidium iodide (PI) at a concentration of 0.05 mg/ml and analyzed by FACScan flow cytometer (BD Biosciences) with WinMDI2.9 software to determine the percentage of cells in each phase of the cell cycle. In all experiments, at least more than 10<sup>4</sup> cells were sorted after gating out the fixation artifacts and cell debris.

## Flow cytometric analysis of apoptosis

For evaluation of cell apoptosis, 10<sup>5</sup> each of GIST882 and GIST48 cells with *shLacZ* or *shAMACR* and 10<sup>5</sup> GIST48 cells treated with EO or vehicle control were plated for 24 h and then incubated with Annexin V-FITC kit (Bender MedSystems, CA) containing propidium iodine for 15 min. The cell percentages at the stages of early apoptosis and late apoptosis, and necrosis were calculated from three independent experiments.



## Statistical Analysis

In the independent validation set, we evaluated the associations of *AMACR* gene dosage and *AMACR* immunoexpression with each other and with clinicopathological factors using the Chi-square, Fisher's exact, or Wilcoxon rank-sum test, as appropriate. Follow-up data were available for 350 patients as of April 2009 (median, 49.9; range, 1–247). When last seen, 236 patients were alive without relapsed disease, 87 developed tumor relapses, including local recurrences in 64 and hepatic and/or peritoneal dissemination in 43, 40 died of GISTs, and 26 died of unrelated causes. The end point was disease-free survival (DFS), which would not be confounded by imatinib therapy for patients with disseminated disease as seen in the evaluation of overall or disease-specific survival [8, 9]. RTK genotypes were dichotomized into two different groups based on prognosis, as previously reported [8, 22]. Briefly, the favorable genotypes included (i) *PDGFRA* mutation involving exons 12 or 18, (ii) 3' tandem insertion of *KIT* exon 11 with or without point mutation, and (iii) single point mutation of *KIT* exon 11. The unfavorable genotypes were (i) Ala502-Tyr503 insertion of *KIT* exon 9, (ii) wild type for both *KIT* and *PDGFRA* genes, and (iii) 5' deletion of *KIT* exon 11 with or without point mutation. We used the log-rank test to compare univariate prognostic analyses. Significant prognosticators with univariate  $p < 0.05$  were generally included in the multivariate Cox regression analysis. As component factors of the NIH risk scheme [1] and NCCN guidelines [15], tumor size and mitotic activity were not introduced in the multivariate comparisons. The difference in *AMACR* mRNA abundance in fresh GIST samples of various risk levels was analyzed by Mann-Whitney U test. Student's t-test was used to analyze quantitative RT-PCR and functional assays for cell line samples.

## ABBREVIATIONS

Array-based comparative genomic hybridization (aCGH), alpha-methylacyl coenzyme A racemase (*AMACR*), bromodeoxyuridine (BrdU), copy number alterations (CNAs), disease-free survival (DFS), fetal bovine serum (FBS), fluorescent in situ hybridization (FISH), gastrointestinal stromal tumors (GIST), laser capture microdissection (LCM), receptor tyrosine kinases (RTKs), human colonic smooth muscle cells (HCSMC), short-hairpin RNAs against *AMACR* expression (*shAMACR*), tissue microarrays (TMA),

## ACKNOWLEDGEMENTS

The authors thank Dr. Jonathan Fletcher for providing GIST cell lines and Chang Gung genomic core laboratory for technical assistance (CMRPG880251).

## GRANT SUPPORT

This work was sponsored by Taiwan Ministry of Science and Technology (NSC99-2628-B-182A-064-MY3 to HYH, NSC99-2320-B-384-001-MY2 to CFL), Ministry of Health and Welfare (DOH100-TMP-009-3, DOH101-TD-C-111-004 and DOH102-TD-M-111-102001 to CFL), and Chang Gung Hospital (CMRPG8C0981 to HYH).

## DISCLOSURE

No conflicts of interest were declared.

## AUTHOR CONTRIBUTIONS

HYH and CFL conceived experiments, analyzed data, and prepared the manuscript. FFC, JL, CYL, SHW, YYC, THH, SHL, TJC, and LTC collected and analyzed data. YHW, SHL, and SCY carried out the experiments. All authors were involved in writing the paper and had final approval of the submitted manuscript.

## REFERENCES

1. Fletcher CD, Berman JJ, Corless C, Gorstein F, Lasota J, Longley BJ, Miettinen M, O'Leary TJ, Remotti H, Rubin BP, Shmookler B, Sobin LH, Weiss SW. Diagnosis of gastrointestinal stromal tumors: A consensus approach. *Hum Pathol* 2002; 33:459-65.
2. Heinrich MC, Rubin BP, Longley BJ, Fletcher JA. Biology and genetic aspects of gastrointestinal stromal tumors: KIT activation and cytogenetic alterations. *Hum Pathol* 2002; 33:484-95.
3. Corless CL, Fletcher JA, Heinrich MC. Biology of gastrointestinal stromal tumors. *J Clin Oncol* 2004; 22:3813-25.
4. Andersson J, Bümbling P, Meis-Kindblom JM, Sihto H, Nupponen N, Joensuu H, Odén A, Gustavsson B, Kindblom LG, Nilsson B. Gastrointestinal stromal tumors with KIT exon 11 deletions are associated with poor prognosis. *Gastroenterology* 2006; 130:1573-81.
5. Antonescu CR, Sommer G, Sarran L, Tschernyavsky SJ, Riedel E, Woodruff JM, Robson M, Maki R, Brennan MF, Ladanyi M, DeMatteo RP, Besmer P. Association of KIT exon 9 mutations with nongastric primary site and aggressive behavior: KIT mutation analysis and clinical correlates of 120 gastrointestinal stromal tumors. *Clin Cancer Res* 2003; 9:3329-37.
6. Bachet JB, Hostein I, Le Cesne A, Brahimi S, Beauchet A, Tabone-Eglinger S, Subra F, Bui B, Duffaud F, Terrier P, Coindre JM, Blay JY, Emile JF. Prognosis and predictive value of KIT exon 11 deletion in GISTs. *Br J Cancer*

2009;101:7-11.

7. Lasota J, Dansonka-Mieszkowska A, Stachura T, Schneider-Stock R, Kallajoki M, Steigen SE, Sarlomo-Rikala M, Boltze C, Kordek R, Roessner A, Stachura J, Miettinen M. Gastrointestinal stromal tumors with internal tandem duplications in 3' end of KIT juxtamembrane domain occur predominantly in stomach and generally seem to have a favorable course. *Mod Pathol* 2003;16:1257-64.
8. Li CF, Huang WW, Wu JM, Yu SC, Hu TH, Uen YH, Tian YF, Lin CN, Lu D, Fang FM, Huang HY. Heat shock protein 90 overexpression independently predicts inferior disease-free survival with differential expression of the alpha and beta isoforms in gastrointestinal stromal tumors. *Clin Cancer Res* 2008;14:7822-31.
9. Martín J, Poveda A, Llombart-Bosch A, Ramos R, López-Guerrero JA, García del Muro J, Maurel J, Calabuig S, Gutierrez A, González de Sande JL, Martínez J, De Juan A, et al. Deletions affecting codons 557-558 of the c-KIT gene indicate a poor prognosis in patients with completely resected gastrointestinal stromal tumors: a study by the Spanish Group for Sarcoma Research (GEIS). *J Clin Oncol* 2005; 23:6190-8.
10. Martín-Broto J, Gutierrez A, Garcia-del-Muro X, Lopez-Guerrero JA, Martinez-Trufero J, de Sande LM, Lainez N, Maurel J, De Juan A, Losa F, Andres R, Casado A, Tejido PG, et al. Prognostic time dependence of deletions affecting codons 557 and/or 558 of KIT gene for relapse-free survival (RFS) in localized GIST: a Spanish Group for Sarcoma Research (GEIS) Study. *Ann Oncol* 2010; 21:1552-7.
11. Assämäki R, Sarlomo-Rikala M, Lopez-Guerrero JA, Lasota J, Andersson LC, Llombart-Bosch A, Miettinen M, Knuutila S. Array comparative genomic hybridization analysis of chromosomal imbalances and their target genes in gastrointestinal stromal tumors. *Genes Chromosomes Cancer* 2007;46:564-76.
12. Gunawan B, von Heydebreck A, Sander B, Schulten HJ, Haller F, Langer C, Armbrust T, Bollmann M, Gasparov S, Kovac D, Füzesi L. An oncogenetic tree model in gastrointestinal stromal tumours (GISTs) identifies different pathways of cytogenetic evolution with prognostic implications. *J Pathol* 2007;211:463-70.
13. Silva M, Veiga I, Ribeiro FR, Vieira J, Pinto C, Pinheiro M, Mesquita B, Santos C, Soares M, Dinis J, Santos L, Lopes P, Afonso M, et al. Chromosome copy number changes carry prognostic information independent of KIT/PDGFRα point mutations in gastrointestinal stromal tumors. *BMC Med* 2010;8:26.
14. Wozniak A, Sciot R, Guillou L, Pauwels P, Wasag B, Stul M, Vermeesch JR, Vandenberghe P, Limon J, Debiec-Rychter M. Array CGH analysis in primary gastrointestinal stromal tumors: cytogenetic profile correlates with anatomic site and tumor aggressiveness, irrespective of mutational status. *Genes Chromosomes Cancer* 2007;46:261-76.
15. Demetri GD, von Mehren M, Antonescu CR, DeMatteo RP, Ganjoo KN, Maki RG, Pisters PW, Raut CP, Riedel RF, Schuetz S, Sundar HM, Trent JC, Wayne JD. NCCN Task Force report: update on the management of patients with gastrointestinal stromal tumors. *J Natl Compr Canc Netw* 2010;8 Suppl 2: S1-41; quiz S2-4.
16. Huang HY, Li CF, Huang WW, Hu TH, Lin CN, Uen YH, Hsiung CY, Lu D. A modification of NIH consensus criteria to better distinguish the highly lethal subset of primary localized gastrointestinal stromal tumors: a subdivision of the original high-risk group on the basis of outcome. *Surgery* 2007;141:748-56.
17. Joensuu H, Vehtari A, Riihimäki J, Nishida T, Steigen SE, Brabec P, Plank L, Nilsson B, Cirilli C, Braconi C, Bordoni A, Magnusson MK, Linke Z, et al. Risk of recurrence of gastrointestinal stromal tumour after surgery: an analysis of pooled population-based cohorts. *Lancet Oncol* 2012;13:265-74.
18. Miettinen M, Makhlof H, Sobin LH, Lasota J. Gastrointestinal stromal tumors of the jejunum and ileum: a clinicopathologic, immunohistochemical, and molecular genetic study of 906 cases before imatinib with long-term follow-up. *Am J Surg Pathol* 2006;30:477-89.
19. Miettinen M, Sobin LH, Lasota J. Gastrointestinal stromal tumors of the stomach: a clinicopathologic, immunohistochemical, and molecular genetic study of 1765 cases with long-term follow-up. *Am J Surg Pathol* 2005;29:52-68.
20. Knuutila S, Armengol G, Björkqvist AM, el-Rifai W, Larramendy ML, Monni O, Szymanska J. Comparative genomic hybridization study on pooled DNAs from tumors of one clinical-pathological entity. *Cancer Genet Cytogenet* 1998;100:25-30.
21. Meza-Zepeda LA, Kresse SH, Barragan-Polania AH, Bjerkehagen B, Ohnstad HO, Namløs HM, Wang J, Kristiansen BE, Myklebost O. Array comparative genomic hybridization reveals distinct DNA copy number differences between gastrointestinal stromal tumors and leiomyosarcomas. *Cancer Res* 2006;66:8984-93.
22. Huang HY, Li SH, Yu SC, Chou FF, Tzeng CC, Hu TH, Uen YH, Tian YF, Wang YH, Fang FM, Huang WW, Wei YC, Wu JM, et al. Homozygous deletion of MTAP gene as a poor prognosticator in gastrointestinal stromal tumors. *Clin Cancer Res* 2009;15:6963-72.
23. Ferdinandusse S, Denis S, IJlst L, Dacremont G, Waterham HR, Wanders RJ. Subcellular localization and physiological role of alpha-methylacyl-CoA racemase. *J Lipid Res* 2000;41:1890-6.
24. Luo J, Zha S, Gage WR, Dunn TA, Hicks JL, Bennett CJ, Ewing CM, Platz EA, Ferdinandusse S, Wanders RJ, Trent JM, Isaacs WB, De Marzo AM. Alpha-methylacyl-CoA racemase: a new molecular marker for prostate cancer. *Cancer Res* 2002;62:2220-6.
25. Rubin MA, Zhou M, Dhanasekaran SM, Varambally S, Barrette TR, Sanda MG, Pienta KJ, Ghosh D, Chinnaiyan AM. alpha-Methylacyl coenzyme A racemase as a tissue biomarker for prostate cancer. *JAMA* 2002;287:1662-70.

26. Zha S, Ferdinandusse S, Denis S, Wanders RJ, Ewing CM, Luo J, De Marzo AM, Isaacs WB. Alpha-methylacyl-CoA racemase as an androgen-independent growth modifier in prostate cancer. *Cancer Res* 2003;63:7365-76.
27. Langner C, Rupar G, Leibl S, Hutterer G, Chromecki T, Hoefler G, Rehak P, Zigeuner R. Alpha-methylacyl-CoA racemase (AMACR/P504S) protein expression in urothelial carcinoma of the upper urinary tract correlates with tumour progression. *Virchows Arch* 2006;448:325-30.
28. Shilo K, Dracheva T, Mani H, Fukuoka J, Sesterhenn IA, Chu WS, Shih JH, Jen J, Travis WD, Franks TJ. Alpha-methylacyl CoA racemase in pulmonary adenocarcinoma, squamous cell carcinoma, and neuroendocrine tumors: expression and survival analysis. *Arch Pathol Lab Med* 2007; 131:1555-60.
29. Wu LC, Chen LT, Tsai YJ, Lin CM, Lin CY, Tian YF, Sheu MJ, Uen YH, Shiue YL, Wang YH, Yang SJ, Wu WR, Li SH, et al. Alpha-methylacyl coenzyme A racemase overexpression in gallbladder carcinoma confers an independent prognostic indicator. *J Clin Pathol* 2012;65:309-14.
30. Zhou M, Chinnaiyan AM, Kleer CG, Lucas PC, Rubin MA. Alpha-Methylacyl-CoA racemase: a novel tumor marker over-expressed in several human cancers and their precursor lesions. *Am J Surg Pathol* 2002;26:926-31.
31. Wilson BA, Wang H, Nacev BA, Mease RC, Liu JO, Pomper MG, Isaacs WB. High-throughput screen identifies novel inhibitors of cancer biomarker alpha-methylacyl coenzyme A racemase (AMACR/P504S). *Mol Cancer Ther* 2011;10:825-38.
32. Li CF, Wang JM, Kang HY, Huang CK, Wang JW, Fang FM, Wang YH, Wu WR, Li SH, Yu SC, Lee JC, Lan J, Shiue YL, et al. Characterization of gene amplification-driven SKP2 overexpression in myxofibrosarcoma: potential implications in tumor progression and therapeutics. *Clin Cancer Res* 2012;18:1598-610.
33. Barretina J, Taylor BS, Banerji S, Ramos AH, Lagos-Quintana M, Decarolis PL, Shah K, Socci ND, Weir BA, Ho A, Chiang DY, Reva B, Mermel CH, et al. Subtype-specific genomic alterations define new targets for soft-tissue sarcoma therapy. *Nat Genet* 2010;42: 715-21.
34. Rieker RJ, Joos S, Bartsch C, Willeke F, Schwarzbach M, Otaño-Joos M, Ohl S, Högel J, Lehnert T, Lichter P, Otto HF, Mechttersheimer G. Distinct chromosomal imbalances in pleomorphic and in high-grade dedifferentiated liposarcomas. *Int J Cancer* 2002;99:68-73.
35. Stock C, Kager L, Fink FM, Gadner H, Ambros PF. Chromosomal regions involved in the pathogenesis of osteosarcomas. *Genes Chromosomes Cancer* 2000;28:329-36.
36. Wilkerson PM, Reis-Filho JS. The 11q13-q14 amplicon: clinicopathological correlations and potential drivers. *Genes Chromosomes Cancer* 2013; 52:333-55.
37. Zha S, Isaacs WB. A nonclassic CCAAT enhancer element binding protein binding site contributes to alpha-methylacyl-CoA racemase expression in prostate cancer. *Mol Cancer Res* 2005;3:110-8.
38. Zhang X, Leav I, Revelo MP, Deka R, Medvedovic M, Jiang Z, Ho SM. Deletion hotspots in AMACR promoter CpG island are cis-regulatory elements controlling the gene expression in the colon. *PLoS Genet* 2009;5:e1000334.
39. Erdmann K, Kaulke K, Thomae C, Huebner D, Sergon M, Froehner M, Wirth MP, Fuessel S. Elevated expression of prostate cancer-associated genes is linked to down-regulation of microRNAs. *BMC Cancer*. 2014;14:82.
40. Singer S, Rubin BP, Lux ML, Chen CJ, Demetri GD, Fletcher CD, Fletcher JA. Prognostic value of KIT mutation type, mitotic activity, and histologic subtype in gastrointestinal stromal tumors. *J Clin Oncol* 2002;20:3898-3905.
41. Rutkowski P, Nowecki ZI, Michej W, Debiec-Rychter M, Woźniak A, Limon J, Siedlecki J, Grzesiakowska U, Kakol M, Osuch C, Polkowski M, Głuszek S, Zurawski Z, et al. Risk criteria and prognostic factors for predicting recurrences after resection of primary gastrointestinal stromal tumor. *Ann Surg Oncol*. 2007;14:2018-27
42. Lv A, Li Z, Tian X, Guan X, Zhao M, Dong B, Hao C. SKP2 high expression, KIT exon 11 deletions, and gastrointestinal bleeding as predictors of poor prognosis in primary gastrointestinal stromal tumors. *PLoS One*. 2013;8:e62951.
43. Sakurai S, Hasegawa T, Sakuma Y, Takazawa Y, Motegi A, Nakajima T, Saito K, Fukayama M, Shimoda T. Myxoid epithelioid gastrointestinal stromal tumor (GIST) with mast cell infiltrations: a subtype of GIST with mutations of platelet-derived growth factor receptor alpha gene. *Hum Pathol*. 2004;35:1223-30.
44. Hanahan D, Weinberg RA. Hallmarks of cancer: the next generation. *Cell* 2011;144:646-74.
45. Festuccia C, Gravina GL, Mancini A, Muzi P, Cesare ED, Kirk R, Smith M, Hughes S, Gibson R, Lian LY, Ricevuto E, Carnell AJ. Trifluorobuprofen inhibits  $\alpha$ -methylacyl coenzyme A racemase (AMACR/P504S), reduces cancer cell proliferation and inhibits in vivo tumor growth in aggressive prostate cancer models. *Anticancer Agents Med Chem*. 2014;14(7):1031-41.
46. Debiec-Rychter M, Cools J, Dumez H, Sciot R, Stul M, Mentens N, Vranckx H, Wasag B, Prenen H, Roesel J, Hagemeyer A, Van Oosterom A, Marynen P. Mechanisms of resistance to imatinib mesylate in gastrointestinal stromal tumors and activity of the PKC412 inhibitor against imatinib-resistant mutants. *Gastroenterology* 2005;128:270-9.
47. Heinrich MC, Corless CL, Blanke CD, Demetri GD, Joensuu H, Roberts PJ, Eisenberg BL, von Mehren M, Fletcher CD, Sandau K, McDougall K, Ou WB, Chen CJ, et al. Molecular correlates of imatinib resistance in gastrointestinal stromal tumors. *J Clin Oncol* 2006;24:4764-74.

48. Joensuu H. Second line therapies for the treatment of gastrointestinal stromal tumor. *Curr Opin Oncol* 2007;19:353-8.
49. Hornick JL, Fletcher CD. The role of KIT in the management of patients with gastrointestinal stromal tumors. *Hum Pathol* 2007;38:679-87.
50. Cairns RA, Harris IS, Mak TW. Regulation of cancer cell metabolism. *Nat Rev Cancer* 2011;11:85-95.
51. Ferdinandusse S, Denis S, Clayton PT, Graham A, Rees JE, Allen JT, McLean BN, Brown AY, Vreken P, Waterham HR, Wanders RJ. Mutations in the gene encoding peroxisomal alpha-methylacyl-CoA racemase cause adult-onset sensory motor neuropathy. *Nat Genet* 2000;24:188-91.
52. Selkälä EM, Kuusisto SM, Salonurmi T, Savolainen MJ, Jauhiainen M, Pirilä PL, Kvist AP, Conzelmann E, Schmitz W, Alexson SE, Kotti TJ, Hiltunen JK, Autio KJ. Metabolic adaptation allows Amacr-deficient mice to remain symptom-free despite low levels of mature bile acids. *Biochim Biophys Acta* 2013;1831:1335-43.
53. Duensing A, Medeiros F, McConarty B, Joseph NE, Panigrahy D, Singer S, Fletcher CD, Demetri GD, Fletcher JA. Mechanisms of oncogenic KIT signal transduction in primary gastrointestinal stromal tumors (GISTs). *Oncogene* 2004;23:3999-4006.
54. Hsueh YS, Yen CC, Shih NY, Chiang NJ, Li CF, Chen LT. Autophagy is involved in endogenous and NVP-AUY922-induced KIT degradation in gastrointestinal stromal tumors. *Autophagy* 2013;9:220-33.
55. Wei YC, Li CF, Yu SC, Chou FF, Fang FM, Eng HL, Uen YH, Tian YF, Wu JM, Li SH, Huang WW, Li WM, Huang HY. Ezrin overexpression in gastrointestinal stromal tumors: an independent adverse prognosticator associated with the non-gastric location. *Mod Pathol* 2009;22:1351-60.
