# Supplementary material for: AMACR amplification and overexpression in primary imatinib-naïve gastrointestinal stromal tumors: a driver of cell proliferation indicating adverse prognosis
Source: PubMed Central journal article supplement (PMC4294386; doi:10.18632/oncotarget.2597), 2014-10-18
Supplement: oncotarget-05-11588-s002.pdf [file oncotarget-05-11588-s002.pdf]

**Table-S1: Clinicopathological and molecular characteristics of the cohort for aCGH analysis**

| <b>Tissue Banking No./Cell Line</b> | <b>Gender</b> | <b>Age</b> | <b>Site</b> | <b>Risk</b>  | <b>Mitosis</b> | <b>Size</b> |
|-------------------------------------|---------------|------------|-------------|--------------|----------------|-------------|
| YiTa                                | F             | 59         | Non-gastric | Low          | 5              | 2.8         |
| 553                                 | F             | 51         | Stomach     | Low          | 0              | 3.5         |
| 612                                 | M             | 71         | Stomach     | Low          | 2              | 3.5         |
| S-2091                              | F             | 62         | Stomach     | Low          | 2              | 4.5         |
| 439                                 | F             | 40         | Non-gastric | Intermediate | 4              | 7.5         |
| 914                                 | F             | 48         | Non-gastric | Intermediate | 4              | 8.5         |
| S-983                               | F             | 73         | Non-gastric | Intermediate | 1              | 6           |
| 1414                                | F             | 50         | Non-gastric | Intermediate | 2              | 8           |
| 1532                                | F             | 57         | Stomach     | Intermediate | 2              | 7.5         |
| 1052                                | M             | 62         | Stomach     | Intermediate | 2              | 5.5         |
| 358                                 | F             | 53         | Stomach     | Intermediate | 1              | 8           |
| S-2390                              | M             | 65         | Stomach     | Intermediate | 2              | 7           |
| S-795                               | F             | 43         | Stomach     | Intermediate | 1              | 8           |
| S-409                               | F             | 77         | Stomach     | Intermediate | 2              | 7           |
| 897                                 | M             | 46         | Stomach     | Intermediate | 7              | 4.5         |
| 1308                                | M             | 40         | Stomach     | Intermediate | 0              | 7.5         |
| 1252                                | F             | 61         | Stomach     | Intermediate | 6              | 3.3         |
| 769                                 | F             | 60         | Non-gastric | High         | 9              | 8.5         |
| 1279                                | F             | 72         | Non-gastric | High         | 25             | 12.5        |
| S-1936                              | M             | 40         | Non-gastric | High         | 10             | 6           |

|              |   |    |             |      |     |      |
|--------------|---|----|-------------|------|-----|------|
| 1205         | M | 48 | Non-gastric | High | 15  | 8.5  |
| 579          | M | 60 | Stomach     | High | 17  | 12.5 |
| 861          | F | 71 | Stomach     | High | 10  | 12   |
| 32           | F | 64 | Stomach     | High | 51  | 5    |
| 231          | M | 49 | Stomach     | High | 30  | 7    |
| S-2507       | F | 59 | Stomach     | High | 37  | 13   |
| S-1320       | F | 71 | Stomach     | High | 32  | 18   |
| 1499         | M | 57 | Stomach     | High | 158 | 16   |
| 1349         | M | 71 | Stomach     | High | 62  | 17   |
| 1375         | M | 63 | Stomach     | High | 50  | 12.5 |
| 813          | F | 75 | Stomach     | High | 13  | 7.5  |
| GIST Low-12  | F | 68 | Stomach     | Low  | 2   | 4.5  |
| GIST Low-10  | F | 84 | Non-gastric | Low  | 2   | 4    |
| GIST inter-1 | F | 70 | Stomach     | Low  | 3   | 7    |
| GIST low-3   | M | 53 | Stomach     | Low  | 1   | 2    |
| GIST low-4   | F | 40 | Non-gastric | Low  | 1   | 3    |
| GIST low-8   | M | 68 | Non-gastric | Low  | 1   | 4    |
| GIST882      |   |    | Cell line   |      |     |      |
| GIST48       |   |    | Cell line   |      |     |      |
