# Supplementary material for: AMACR amplification and overexpression in primary imatinib-naïve gastrointestinal stromal tumors: a driver of cell proliferation indicating adverse prognosis
Source: PubMed Central journal article supplement (PMC4294386; doi:10.18632/oncotarget.2597), 2014-10-18
Supplement: oncotarget-05-11588-s003.pdf [file oncotarget-05-11588-s003.pdf]

**Table-S2: Summary of chromosomal regions with differential copy number alterations that are significantly prevalent in high-risk GISTs and cell lines.**

| <b>Region</b>                | <b>Cytoband Location</b> | <b>Event</b> | <b>Genes</b> | <b>Region Length</b> | <b>Freq. in &lt;High Risk&gt; (%)</b> | <b>Freq. in &lt;Non-High risk&gt; (%)</b> | <b>Difference (%)</b> | <b>p-value</b> |
|------------------------------|--------------------------|--------------|--------------|----------------------|---------------------------------------|-------------------------------------------|-----------------------|----------------|
| chr1:206,222,053-206,534,537 | q32.2                    | CN Gain      | 1            | 312484               | 25                                    | 0                                         | 25                    | 0.022127       |
| chr5:100,148-128,204         | p15.33                   | CN Gain      | 0            | 28056                | 31.25                                 | 4.347826087                               | 26.90217391           | 0.033247       |
| chr5:128,204-183,499         | p15.33                   | CN Gain      | 0            | 55295                | 37.5                                  | 4.347826087                               | 33.15217391           | 0.012719       |
| chr5:183,499-240,679         | p15.33                   | CN Gain      | 1            | 57180                | 37.5                                  | 0                                         | 37.5                  | 0.002454       |
| chr5:240,679-478,181         | p15.33                   | CN Gain      | 9            | 237502               | 37.5                                  | 4.347826087                               | 33.15217391           | 0.012719       |
| chr5:478,181-705,364         | p15.33                   | CN Gain      | 12           | 227183               | 31.25                                 | 4.347826087                               | 26.90217391           | 0.033247       |
| chr5:718,900-843,760         | p15.33                   | CN Gain      | 1            | 124860               | 37.5                                  | 8.695652174                               | 28.80434783           | 0.045386       |
| chr5:886,912-906,396         | p15.33                   | CN Gain      | 2            | 19484                | 37.5                                  | 8.695652174                               | 28.80434783           | 0.045386       |
| chr5:934,489-1,034,528       | p15.33                   | CN Gain      | 3            | 100039               | 37.5                                  | 8.695652174                               | 28.80434783           | 0.045386       |
| chr5:1,034,528-2,121,917     | p15.33                   | CN Gain      | 24           | 1087389              | 37.5                                  | 4.347826087                               | 33.15217391           | 0.012719       |
| chr5:2,121,917-2,234,406     | p15.33                   | CN Gain      | 0            | 112489               | 31.25                                 | 4.347826087                               | 26.90217391           | 0.033247       |
| chr5:2,234,406-3,615,822     | p15.33                   | CN Gain      | 4            | 1381416              | 31.25                                 | 0                                         | 31.25                 | 0.007587       |
| chr5:3,615,822-3,765,741     | p15.33                   | CN Gain      | 1            | 149919               | 37.5                                  | 0                                         | 37.5                  | 0.002454       |
| chr5:3,765,741-4,296,933     | p15.33                   | CN Gain      | 0            | 531192               | 31.25                                 | 0                                         | 31.25                 | 0.007587       |
| chr5:4,296,933-4,550,161     | p15.33 - p15.32          | CN Gain      | 0            | 253228               | 37.5                                  | 0                                         | 37.5                  | 0.002454       |
| chr5:4,550,161-12,234,432    | p15.32 - p15.2           | CN Gain      | 51           | 7684271              | 31.25                                 | 0                                         | 31.25                 | 0.007587       |
| chr5:12,234,432-12,747,023   | p15.2                    | CN Gain      | 3            | 512591               | 31.25                                 | 4.347826087                               | 26.90217391           | 0.033247       |
| chr5:12,747,023-16,865,708   | p15.2 - p15.1            | CN Gain      | 17           | 4118685              | 31.25                                 | 0                                         | 31.25                 | 0.007587       |
| chr5:16,865,708-17,171,975   | p15.1                    | CN Gain      | 1            | 306267               | 25                                    | 0                                         | 25                    | 0.022127       |
| chr5:17,171,975-18,934,533   | p15.1 - p14.3            | CN Gain      | 8            | 1762558              | 31.25                                 | 0                                         | 31.25                 | 0.007587       |
| chr5:18,934,533-19,359,449   | p14.3                    | CN Gain      | 0            | 424916               | 25                                    | 0                                         | 25                    | 0.022127       |
| chr5:30,596,947-32,141,810   | p13.3                    | CN Gain      | 7            | 1544863              | 25                                    | 0                                         | 25                    | 0.022127       |
| chr5:32,209,908-34,090,601   | p13.3                    | CN Gain      | 15           | 1880693              | 25                                    | 0                                         | 25                    | 0.022127       |

|                              |               |         |    |         |       |             |             |          |
|------------------------------|---------------|---------|----|---------|-------|-------------|-------------|----------|
| chr5:34,439,900-36,939,161   | p13.2         | CN Gain | 26 | 2499261 | 25    | 0           | 25          | 0.022127 |
| chr5:37,033,081-45,481,429   | p13.2 - p12   | CN Gain | 72 | 8448348 | 25    | 0           | 25          | 0.022127 |
| chr5:45,481,429-45,843,829   | p12 - p11     | CN Gain | 1  | 362400  | 31.25 | 0           | 31.25       | 0.007587 |
| chr5:45,843,829-45,909,430   | p11           | CN Gain | 0  | 65601   | 31.25 | 4.347826087 | 26.90217391 | 0.033247 |
| chr5:45,909,430-45,934,435   | p11           | CN Gain | 0  | 25005   | 37.5  | 4.347826087 | 33.15217391 | 0.012719 |
| chr5:45,934,435-45,950,112   | p11           | CN Gain | 0  | 15677   | 31.25 | 4.347826087 | 26.90217391 | 0.033247 |
| chr5:49,493,854-49,600,885   | q11.1         | CN Gain | 0  | 107031  | 31.25 | 0           | 31.25       | 0.007587 |
| chr5:49,600,885-49,664,956   | q11.1         | CN Gain | 0  | 64071   | 31.25 | 4.347826087 | 26.90217391 | 0.033247 |
| chr5:49,664,956-50,022,645   | q11.1         | CN Gain | 2  | 357689  | 31.25 | 0           | 31.25       | 0.007587 |
| chr5:50,022,645-50,890,695   | q11.1 - q11.2 | CN Gain | 3  | 868050  | 31.25 | 4.347826087 | 26.90217391 | 0.033247 |
| chr5:75,287,655-76,168,956   | q13.3         | CN Gain | 7  | 881301  | 31.25 | 4.347826087 | 26.90217391 | 0.033247 |
| chr5:78,615,755-78,759,445   | q14.1         | CN Gain | 3  | 143690  | 31.25 | 4.347826087 | 26.90217391 | 0.033247 |
| chr5:79,222,065-83,679,890   | q14.1 - q14.3 | CN Gain | 43 | 4457825 | 31.25 | 4.347826087 | 26.90217391 | 0.033247 |
| chr5:85,563,021-85,828,238   | q14.3         | CN Gain | 1  | 265217  | 31.25 | 4.347826087 | 26.90217391 | 0.033247 |
| chr5:86,015,818-86,303,207   | q14.3         | CN Gain | 1  | 287389  | 31.25 | 4.347826087 | 26.90217391 | 0.033247 |
| chr5:141,109,598-141,340,696 | q31.3         | CN Gain | 7  | 231098  | 31.25 | 4.347826087 | 26.90217391 | 0.033247 |
| chr5:158,928,162-159,190,721 | q33.3         | CN Gain | 1  | 262559  | 31.25 | 4.347826087 | 26.90217391 | 0.033247 |
| chr5:160,290,819-161,665,752 | q34           | CN Gain | 7  | 1374933 | 31.25 | 4.347826087 | 26.90217391 | 0.033247 |
| chr5:163,915,793-164,390,873 | q34           | CN Gain | 1  | 475080  | 31.25 | 4.347826087 | 26.90217391 | 0.033247 |
| chr5:164,872,061-165,072,039 | q34           | CN Gain | 0  | 199978  | 31.25 | 4.347826087 | 26.90217391 | 0.033247 |
| chr5:166,237,671-166,959,558 | q34           | CN Gain | 1  | 721887  | 31.25 | 4.347826087 | 26.90217391 | 0.033247 |
| chr5:169,340,866-169,353,199 | q35.1         | CN Gain | 1  | 12333   | 31.25 | 4.347826087 | 26.90217391 | 0.033247 |
| chr5:169,353,199-170,206,345 | q35.1         | CN Gain | 11 | 853146  | 37.5  | 4.347826087 | 33.15217391 | 0.012719 |
| chr5:170,206,345-170,215,631 | q35.1         | CN Gain | 0  | 9286    | 31.25 | 4.347826087 | 26.90217391 | 0.033247 |
| chr5:170,478,314-170,615,720 | q35.1         | CN Gain | 3  | 137406  | 31.25 | 4.347826087 | 26.90217391 | 0.033247 |
| chr5:170,615,720-171,209,592 | q35.1         | CN Gain | 7  | 593872  | 37.5  | 4.347826087 | 33.15217391 | 0.012719 |
| chr5:171,209,592-171,428,262 | q35.1         | CN Gain | 2  | 218670  | 31.25 | 4.347826087 | 26.90217391 | 0.033247 |
| chr5:171,428,262-172,359,501 | q35.1 - q35.2 | CN Gain | 15 | 931239  | 37.5  | 4.347826087 | 33.15217391 | 0.012719 |

|                              |                 |         |     |          |       |             |             |          |
|------------------------------|-----------------|---------|-----|----------|-------|-------------|-------------|----------|
| chr5:172,359,501-174,634,530 | q35.2           | CN Gain | 16  | 2275029  | 31.25 | 4.347826087 | 26.90217391 | 0.033247 |
| chr5:175,600,107-175,853,265 | q35.2           | CN Gain | 8   | 253158   | 31.25 | 4.347826087 | 26.90217391 | 0.033247 |
| chr5:175,875,108-176,253,229 | q35.2           | CN Gain | 11  | 378121   | 37.5  | 8.695652174 | 28.80434783 | 0.045386 |
| chr5:176,628,294-176,659,409 | q35.3           | CN Gain | 1   | 31115    | 37.5  | 8.695652174 | 28.80434783 | 0.045386 |
| chr7:5,222,111-5,634,551     | p22.1           | CN Gain | 11  | 412440   | 25    | 0           | 25          | 0.022127 |
| chr7:15,909,600-16,378,220   | p21.1           | CN Gain | 4   | 468620   | 25    | 0           | 25          | 0.022127 |
| chr7:71,053,359-71,300,143   | q11.22          | CN Gain | 1   | 246784   | 25    | 0           | 25          | 0.022127 |
| chr7:77,059,572-95,909,500   | q11.23 - q21.3  | CN Gain | 111 | 18849928 | 25    | 0           | 25          | 0.022127 |
| chr8:47,103,225-47,109,488   | q11.1           | CN Gain | 0   | 6263     | 37.5  | 8.695652174 | 28.80434783 | 0.045386 |
| chr8:47,478,237-47,497,066   | q11.1           | CN Gain | 0   | 18829    | 37.5  | 8.695652174 | 28.80434783 | 0.045386 |
| chr8:47,497,066-47,578,243   | q11.1           | CN Gain | 0   | 81177    | 31.25 | 4.347826087 | 26.90217391 | 0.033247 |
| chr8:54,568,906-69,421,996   | q11.23 - q13.2  | CN Gain | 116 | 14853090 | 25    | 0           | 25          | 0.022127 |
| chr8:69,696,979-90,203,177   | q13.2 - q21.3   | CN Gain | 111 | 20506198 | 25    | 0           | 25          | 0.022127 |
| chr8:90,865,702-98,553,288   | q21.3 - q22.1   | CN Gain | 60  | 7687586  | 25    | 0           | 25          | 0.022127 |
| chr8:98,553,288-101,809,486  | q22.1 - q22.3   | CN Gain | 31  | 3256198  | 31.25 | 0           | 31.25       | 0.007587 |
| chr8:101,809,486-103,496,959 | q22.3           | CN Gain | 13  | 1687473  | 25    | 0           | 25          | 0.022127 |
| chr8:103,496,959-103,896,920 | q22.3           | CN Gain | 3   | 399961   | 31.25 | 0           | 31.25       | 0.007587 |
| chr8:103,896,920-105,328,257 | q22.3           | CN Gain | 19  | 1431337  | 25    | 0           | 25          | 0.022127 |
| chr8:105,328,257-108,159,488 | q22.3 - q23.1   | CN Gain | 10  | 2831231  | 31.25 | 0           | 31.25       | 0.007587 |
| chr8:108,159,488-117,884,454 | q23.1 - q24.11  | CN Gain | 22  | 9724966  | 25    | 0           | 25          | 0.022127 |
| chr8:117,884,454-118,259,439 | q24.11          | CN Gain | 6   | 374985   | 31.25 | 0           | 31.25       | 0.007587 |
| chr8:118,259,439-118,546,897 | q24.11          | CN Gain | 0   | 287458   | 25    | 0           | 25          | 0.022127 |
| chr8:118,906,345-123,340,732 | q24.11 - q24.13 | CN Gain | 23  | 4434387  | 25    | 0           | 25          | 0.022127 |
| chr8:123,340,732-126,084,541 | q24.13          | CN Gain | 42  | 2743809  | 31.25 | 0           | 31.25       | 0.007587 |
| chr8:126,084,541-126,334,523 | q24.13          | CN Gain | 3   | 249982   | 37.5  | 0           | 37.5        | 0.002454 |
| chr8:126,334,523-136,996,951 | q24.13 - q24.23 | CN Gain | 69  | 10662428 | 31.25 | 0           | 31.25       | 0.007587 |
| chr8:136,996,951-137,121,979 | q24.23          | CN Gain | 0   | 125028   | 37.5  | 0           | 37.5        | 0.002454 |
| chr8:137,121,979-139,075,049 | q24.23          | CN Gain | 0   | 1953070  | 31.25 | 0           | 31.25       | 0.007587 |

|                              |                |         |    |         |       |             |             |          |
|------------------------------|----------------|---------|----|---------|-------|-------------|-------------|----------|
| chr8:139,075,049-139,496,959 | q24.23         | CN Gain | 2  | 421910  | 25    | 0           | 25          | 0.022127 |
| chr8:139,740,831-140,034,437 | q24.23 - q24.3 | CN Gain | 1  | 293606  | 25    | 0           | 25          | 0.022127 |
| chr8:140,034,437-141,784,482 | q24.3          | CN Gain | 9  | 1750045 | 31.25 | 0           | 31.25       | 0.007587 |
| chr8:141,784,482-142,034,571 | q24.3          | CN Gain | 2  | 250089  | 37.5  | 0           | 37.5        | 0.002454 |
| chr8:142,034,571-142,040,836 | q24.3          | CN Gain | 2  | 6265    | 37.5  | 4.347826087 | 33.15217391 | 0.012719 |
| chr8:142,040,836-142,065,758 | q24.3          | CN Gain | 2  | 24922   | 37.5  | 8.695652174 | 28.80434783 | 0.045386 |
| chr8:142,121,977-143,197,030 | q24.3          | CN Gain | 11 | 1075053 | 37.5  | 8.695652174 | 28.80434783 | 0.045386 |
| chr8:146,103,269-146,274,826 | q24.3          | CN Gain | 6  | 171557  | 25    | 0           | 25          | 0.022127 |
| chr12:97,073-215,761         | p13.33         | CN Gain | 5  | 118688  | 25    | 0           | 25          | 0.022127 |
| chr12:3,415,701-3,590,780    | p13.32         | CN Gain | 14 | 175079  | 25    | 0           | 25          | 0.022127 |
| chr12:54,753,319-54,943,766  | q13.2          | CN Gain | 17 | 190447  | 25    | 0           | 25          | 0.022127 |
| chr16:10,878,279-11,034,530  | p13.13         | CN Gain | 5  | 156251  | 25    | 0           | 25          | 0.022127 |
| chr16:70,946,922-71,309,521  | q22.3          | CN Gain | 3  | 362599  | 25    | 0           | 25          | 0.022127 |
| chr1:35,978,240-36,240,768   | p34.3          | CN Loss | 5  | 262528  | 56.25 | 21.73913043 | 34.51086957 | 0.042788 |
| chr1:42,728,210-42,946,930   | p34.2          | CN Loss | 6  | 218720  | 50    | 17.39130435 | 32.60869565 | 0.040743 |
| chr1:65,140,743-65,684,430   | p31.3          | CN Loss | 11 | 543687  | 56.25 | 21.73913043 | 34.51086957 | 0.042788 |
| chr1:69,284,541-69,740,643   | p31.2 - p31.1  | CN Loss | 0  | 456102  | 50    | 17.39130435 | 32.60869565 | 0.040743 |
| chr1:75,809,441-76,909,571   | p31.1          | CN Loss | 10 | 1100130 | 50    | 17.39130435 | 32.60869565 | 0.040743 |
| chr1:83,778,228-84,059,503   | p31.1          | CN Loss | 2  | 281275  | 50    | 17.39130435 | 32.60869565 | 0.040743 |
| chr1:103,937,005-104,113,410 | p21.1          | CN Loss | 6  | 176405  | 37.5  | 8.695652174 | 28.80434783 | 0.045386 |
| chr1:115,290,732-115,322,102 | p13.2          | CN Loss | 1  | 31370   | 56.25 | 21.73913043 | 34.51086957 | 0.042788 |
| chr1:121,051,013-121,143,933 | p11.2 - p11.1  | CN Loss | 0  | 92920   | 37.5  | 8.695652174 | 28.80434783 | 0.045386 |
| chr3:128,109,474-128,403,226 | q21.3          | CN Loss | 4  | 293752  | 31.25 | 4.347826087 | 26.90217391 | 0.033247 |
| chr4:152,353,276-154,734,513 | q31.3          | CN Loss | 26 | 2381237 | 25    | 0           | 25          | 0.022127 |
| chr4:174,596,983-174,609,473 | q34.1          | CN Loss | 0  | 12490   | 25    | 0           | 25          | 0.022127 |
| chr4:182,728,268-183,922,063 | q35.1          | CN Loss | 6  | 1193795 | 25    | 0           | 25          | 0.022127 |
| chr4:183,922,063-188,540,681 | q35.1 - q35.2  | CN Loss | 67 | 4618618 | 31.25 | 0           | 31.25       | 0.007587 |
| chr4:188,540,681-188,997,044 | q35.2          | CN Loss | 1  | 456363  | 25    | 0           | 25          | 0.022127 |

|                               |                |         |    |         |       |             |             |          |
|-------------------------------|----------------|---------|----|---------|-------|-------------|-------------|----------|
| chr9:21,812,679-21,903,136    | p21.3          | CN Loss | 2  | 90457   | 37.5  | 8.695652174 | 28.80434783 | 0.045386 |
| chr9:21,903,136-21,950,222    | p21.3          | CN Loss | 1  | 47086   | 43.75 | 8.695652174 | 35.05434783 | 0.018965 |
| chr9:21,950,222-22,097,049    | p21.3          | CN Loss | 6  | 146827  | 50    | 8.695652174 | 41.30434783 | 0.007348 |
| chr9:22,097,049-22,115,800    | p21.3          | CN Loss | 2  | 18751   | 43.75 | 8.695652174 | 35.05434783 | 0.018965 |
| chr9:22,115,800-22,128,206    | p21.3          | CN Loss | 0  | 12406   | 37.5  | 8.695652174 | 28.80434783 | 0.045386 |
| chr10:42,778,253-42,953,213   | q11.21         | CN Loss | 1  | 174960  | 37.5  | 8.695652174 | 28.80434783 | 0.045386 |
| chr10:75,059,464-75,265,788   | q22.2          | CN Loss | 15 | 206324  | 31.25 | 4.347826087 | 26.90217391 | 0.033247 |
| chr10:77,271,989-77,478,320   | q22.2 - q22.3  | CN Loss | 1  | 206331  | 31.25 | 4.347826087 | 26.90217391 | 0.033247 |
| chr10:79,472,032-80,478,184   | q22.3          | CN Loss | 11 | 1006152 | 31.25 | 4.347826087 | 26.90217391 | 0.033247 |
| chr10:80,478,184-80,490,720   | q22.3          | CN Loss | 5  | 12536   | 31.25 | 0           | 31.25       | 0.007587 |
| chr10:80,490,720-80,503,200   | q22.3          | CN Loss | 7  | 12480   | 31.25 | 4.347826087 | 26.90217391 | 0.033247 |
| chr10:80,503,200-80,528,158   | q22.3          | CN Loss | 1  | 24958   | 37.5  | 4.347826087 | 33.15217391 | 0.012719 |
| chr10:80,528,158-80,697,018   | q22.3          | CN Loss | 2  | 168860  | 37.5  | 8.695652174 | 28.80434783 | 0.045386 |
| chr10:82,822,015-83,234,436   | q23.1          | CN Loss | 0  | 412421  | 31.25 | 4.347826087 | 26.90217391 | 0.033247 |
| chr10:98,728,314-98,971,885   | q24.1          | CN Loss | 7  | 243571  | 31.25 | 4.347826087 | 26.90217391 | 0.033247 |
| chr10:105,184,599-105,315,722 | q24.33         | CN Loss | 6  | 131123  | 31.25 | 4.347826087 | 26.90217391 | 0.033247 |
| chr10:105,315,722-105,615,800 | q24.33         | CN Loss | 4  | 300078  | 37.5  | 8.695652174 | 28.80434783 | 0.045386 |
| chr10:105,615,800-105,640,749 | q24.33         | CN Loss | 1  | 24949   | 37.5  | 4.347826087 | 33.15217391 | 0.012719 |
| chr10:105,640,749-105,715,798 | q24.33 - q25.1 | CN Loss | 1  | 75049   | 31.25 | 4.347826087 | 26.90217391 | 0.033247 |
| chr10:112,440,789-112,622,068 | q25.2          | CN Loss | 4  | 181279  | 31.25 | 4.347826087 | 26.90217391 | 0.033247 |
| chr11:3,300,176-3,722,046     | p15.4          | CN Loss | 13 | 421870  | 25    | 0           | 25          | 0.022127 |
| chr11:3,722,046-3,846,961     | p15.4          | CN Loss | 7  | 124915  | 31.25 | 0           | 31.25       | 0.007587 |
| chr11:3,846,961-4,928,276     | p15.4          | CN Loss | 24 | 1081315 | 25    | 0           | 25          | 0.022127 |
| chr11:5,303,194-8,196,957     | p15.4          | CN Loss | 99 | 2893763 | 25    | 0           | 25          | 0.022127 |
| chr11:8,334,521-8,847,086     | p15.4          | CN Loss | 8  | 512565  | 25    | 0           | 25          | 0.022127 |
| chr11:10,275,203-10,797,022   | p15.4 - p15.3  | CN Loss | 18 | 521819  | 25    | 0           | 25          | 0.022127 |
| chr11:16,009,530-16,065,796   | p15.2          | CN Loss | 1  | 56266   | 31.25 | 4.347826087 | 26.90217391 | 0.033247 |
| chr11:17,915,795-19,215,734   | p15.1          | CN Loss | 33 | 1299939 | 31.25 | 4.347826087 | 26.90217391 | 0.033247 |

|                             |               |         |    |         |       |             |             |          |
|-----------------------------|---------------|---------|----|---------|-------|-------------|-------------|----------|
| chr11:20,247,118-20,890,851 | p15.1         | CN Loss | 4  | 643733  | 31.25 | 4.347826087 | 26.90217391 | 0.033247 |
| chr11:34,465,749-36,390,779 | p13           | CN Loss | 19 | 1925030 | 25    | 0           | 25          | 0.022127 |
| chr11:36,459,559-37,706,378 | p12           | CN Loss | 5  | 1246819 | 25    | 0           | 25          | 0.022127 |
| chr11:37,947,079-40,540,681 | p12           | CN Loss | 1  | 2593602 | 25    | 0           | 25          | 0.022127 |
| chr11:42,303,244-43,459,482 | p12 - p11.2   | CN Loss | 4  | 1156238 | 25    | 0           | 25          | 0.022127 |
| chr11:43,921,988-44,240,753 | p11.2         | CN Loss | 6  | 318765  | 25    | 0           | 25          | 0.022127 |
| chr18:16,100,000-17,737,634 | q11.1 - q11.2 | CN Loss | 14 | 1637634 | 25    | 0           | 25          | 0.022127 |
| chr22:24,209,525-24,240,860 | q11.23        | CN Loss | 1  | 31335   | 75    | 39.13043478 | 35.86956522 | 0.04919  |
| chr22:25,247,001-25,315,769 | q12.1         | CN Loss | 2  | 68768   | 75    | 39.13043478 | 35.86956522 | 0.04919  |
| chr22:29,653,304-29,803,196 | q12.2         | CN Loss | 3  | 149892  | 75    | 39.13043478 | 35.86956522 | 0.04919  |
| chr22:31,490,804-33,915,694 | q12.3         | CN Loss | 10 | 2424890 | 75    | 39.13043478 | 35.86956522 | 0.04919  |
| chrX:32,909,474-33,546,973  | p21.1         | CN Loss | 1  | 637499  | 31.25 | 4.347826087 | 26.90217391 | 0.033247 |
| chrX:33,603,345-33,703,270  | p21.1         | CN Loss | 0  | 99925   | 25    | 0           | 25          | 0.022127 |
| chrX:48,134,429-48,203,316  | p11.23        | CN Loss | 3  | 68887   | 25    | 0           | 25          | 0.022127 |
