# Supplementary material for: AMACR amplification and overexpression in primary imatinib-naïve gastrointestinal stromal tumors: a driver of cell proliferation indicating adverse prognosis
Source: PubMed Central journal article supplement (PMC4294386; doi:10.18632/oncotarget.2597), 2014-10-18
Supplement: oncotarget-05-11588-s005.pdf [file oncotarget-05-11588-s005.pdf]

**Table-S4. Associations of AMACR expression and gene dosage with various clinicopathological parameters in 350 GIST patients.**

|                       | AMACR Expression |      | p-value | AMACR Gene |      | p-value |
|-----------------------|------------------|------|---------|------------|------|---------|
|                       | Low              | High |         | No Amp.    | Amp. |         |
| <b>NCCN Guideline</b> |                  |      | <0.001* |            |      | <0.001* |
| None/Very low         | 74               | 14   |         | 85         | 3    |         |
| Low                   | 65               | 35   |         | 90         | 10   |         |
| Moderate              | 42               | 23   |         | 49         | 16   |         |
| High                  | 37               | 60   |         | 57         | 40   |         |

**\*: Statistically significant**
