# Supplementary material for: AMACR amplification and overexpression in primary imatinib-naïve gastrointestinal stromal tumors: a driver of cell proliferation indicating adverse prognosis
Source: PubMed Central journal article supplement (PMC4294386; doi:10.18632/oncotarget.2597), 2014-10-18
Supplement: oncotarget-05-11588-s006.pdf [file oncotarget-05-11588-s006.pdf]

**Table-S5 Univariate and Multivariate Analyses for Disease-free survival**

| Parameter                                 | Univariate analysis |           |                    | Multivariate analysis |             |                   |
|-------------------------------------------|---------------------|-----------|--------------------|-----------------------|-------------|-------------------|
|                                           | No. Case            | No. Event | p-value            | HR                    | 95% CI      | p-value           |
| <b>Sex</b>                                |                     |           | 0.4667             |                       |             |                   |
| Male                                      | 177                 | 43        |                    |                       |             |                   |
| Female                                    | 173                 | 44        |                    |                       |             |                   |
| <b>Age (years)</b>                        |                     |           | 0.0584             |                       |             |                   |
| <70                                       | 259                 | 59        |                    |                       |             |                   |
| >=70                                      | 91                  | 28        |                    |                       |             |                   |
| <b>Location</b>                           |                     |           | <b>0.0023*</b>     |                       |             | 0.856             |
| Gastric                                   | 211                 | 40        |                    | 1                     | -           |                   |
| Non-gastric                               | 139                 | 47        |                    | 1.048                 | 0.630-1.745 |                   |
| <b>Histologic Type</b>                    |                     |           | <b>&lt;0.0001*</b> |                       |             | <b>0.008*</b>     |
| Spindle                                   | 266                 | 51        |                    | 1                     | -           |                   |
| Mixed/Epithelioid                         | 84                  | 36        |                    | 2.038                 | 1.204-3.449 |                   |
| <b>Tumor Size (cm)<sup>#</sup></b>        |                     |           | <b>&lt;0.0001*</b> |                       |             |                   |
| =<5 cm                                    | 161                 | 16        |                    |                       |             |                   |
| >5; =<10 cm                               | 131                 | 38        |                    |                       |             |                   |
| >10 cm                                    | 58                  | 33        |                    |                       |             |                   |
| <b>Mitotic Count (50HPFs)<sup>#</sup></b> |                     |           | <b>&lt;0.0001*</b> |                       |             |                   |
| 0-5                                       | 249                 | 33        |                    |                       |             |                   |
| 6-10                                      | 43                  | 14        |                    |                       |             |                   |
| >10                                       | 58                  | 40        |                    |                       |             |                   |
| <b>NCCN Guideline</b>                     |                     |           | <b>&lt;0.0001*</b> |                       |             | <b>&lt;0.001*</b> |
| None/Very low                             | 88                  | 3         |                    | 1                     | -           |                   |
| Low                                       | 100                 | 10        |                    | 2.915                 | 1.433-5.747 |                   |
| Moderate                                  | 65                  | 15        |                    | 3.040                 | 1.433-6.452 |                   |
| High                                      | 97                  | 59        |                    | 8.065                 | 1477-34.483 |                   |
| <b>Mutation Type</b>                      |                     |           | <b>0.0005*</b>     |                       |             |                   |
| Favorable type                            | 106                 | 22        |                    | 1                     | -           | 0.055*            |
| Unfavorable type                          | 107                 | 45        |                    | 1.690                 | 0.988-2.890 |                   |
| <b>AMACR gene</b>                         |                     |           | <b>&lt;0.0001*</b> |                       |             | <b>0.033*</b>     |
| Non-amplified                             | 281                 | 34        |                    | 1                     | -           |                   |
| Amplification                             | 69                  | 53        |                    | 1.919                 | 1.055-3.490 |                   |
| <b>AMACR expression<sup>#</sup></b>       |                     |           | <b>&lt;0.0001*</b> |                       |             | <b>&lt;0.001*</b> |
| Expressed                                 | 218                 | 21        |                    | 1                     | -           |                   |
| Deficient                                 | 132                 | 66        |                    | 3.627                 | 1.811-7.262 |                   |

<sup>#</sup>, Tumor size and mitotic activity were not introduced in multivariate analysis, since these two parameters were component factors of NIH risk scheme; \*, Statistically significant. HR, hazard ratio.
